# Supplementary material for: PEG–Lipid–PLGA Hybrid Particles for Targeted Delivery of Anti-Inflammatory Drugs
Source: MDPI journal article supplement (doi:10.3390/pharmaceutics16020187), 2024-01-28
Supplement: s1 [file s1]

# Supporting information

## PEG–Lipid–PLGA Hybrid Particles for Targeted Delivery of Anti-Inflammatory Drugs

Jana Ismail <sup>1,†</sup>, Lea C. Klepsch <sup>1,†</sup>, Philipp Dahlke <sup>2</sup>, Ekaterina Tsarenko <sup>1</sup>, Antje Vollrath <sup>1,3</sup>, David Pretzel <sup>1,3</sup>, Paul M. Jordan <sup>2,3</sup>, Kourosh Rezaei <sup>1</sup>, Justyna A. Czaplewska <sup>1,3</sup>, Steffi Stumpf <sup>1,3</sup>, Baerbel Beringer-Siemers <sup>1,3</sup>, Ivo Nischang <sup>1,3,4,5</sup>, Stephanie Hoeppener <sup>1,3</sup>, Oliver Werz <sup>2,3</sup> and Ulrich S. Schubert <sup>1,3,4,\*</sup>

<sup>1</sup> *Laboratory of Organic and Macromolecular Chemistry (IOMC)  
Friedrich Schiller University Jena, Humboldtstraße 10, 07743 Jena, Germany*

<sup>2</sup> *Department of Pharmaceutical/Medicinal Chemistry, Institute of Pharmacy  
Friedrich Schiller University Jena, Philosophenweg 14, 07743 Jena, Germany*

<sup>3</sup> *Jena Center for Soft Matter (JCSM)  
Friedrich Schiller University Jena, Philosophenweg 7, 07743 Jena, Germany*

<sup>4</sup> *Helmholtz Institute for Polymers in Energy Applications Jena (HIPOLE Jena), Lessingstraße 12-14, 07743 Jena, Germany*

<sup>5</sup> *Helmholtz-Zentrum Berlin für Materialien und Energie GmbH (HZB), Hahn-Meitner-Platz 1, 14109 Berlin, Germany*

\* Correspondence: ulrich.schubert@uni-jena.de

† These authors contributed equally to this work.

### 1 Table of contents

|       |                                                                                    |    |
|-------|------------------------------------------------------------------------------------|----|
| 2     | Methods .....                                                                      | 4  |
| 2.1   | Formulation Method for HNPs .....                                                  | 4  |
| 2.2   | Analyses of Particle Size Distributions in SEM Images Using OpenCV in Python ..... | 5  |
| 2.3   | HPLC Analysis of HNPs.....                                                         | 7  |
| 2.4   | CD14 FITC Staining of Isolated Macrophages.....                                    | 8  |
| 3     | Materials.....                                                                     | 9  |
| 3.1   | HNP components: Polymers, lipids and PEG-Lipids .....                              | 9  |
| 3.2   | Cargo molecules (dye and drug).....                                                | 10 |
| 4     | Results .....                                                                      | 11 |
| 4.1   | HNPs and NLO lLoaded HNPs .....                                                    | 11 |
| 4.1.1 | Formulation .....                                                                  | 11 |
| 4.1.2 | Particle characteristics .....                                                     | 12 |
| 4.1.3 | SEC analysis .....                                                                 | 13 |
| 4.1.4 | Particle size distribution analysis from SEM images .....                          | 15 |
| 4.1.5 | Stability in PBS and in acetate buffer .....                                       | 16 |

|       |                                                                                |    |
|-------|--------------------------------------------------------------------------------|----|
| 4.1.6 | Degradation of HNPs .....                                                      | 18 |
| 4.1.7 | Cytotoxicity studies .....                                                     | 19 |
| 4.1.8 | Uptake studies in M0-MDMs.....                                                 | 20 |
| 4.2   | Dual Loaded PEG-Lipid-PLGA HNPs with Different Sizes and Functionalities ..... | 22 |
| 4.2.1 | Formulation .....                                                              | 22 |
| 4.2.2 | Particle characteristics .....                                                 | 23 |
| 4.2.3 | Particle size distribution analysis from SEM images .....                      | 26 |
| 4.2.4 | Free drug analysis <i>via</i> SEM measurements .....                           | 28 |
| 4.2.5 | Loading capacities of dual loaded HNPs.....                                    | 29 |
| 4.2.6 | Stability in PBS and in acetate buffer .....                                   | 30 |
| 4.2.7 | HPLC analysis of dual loaded HNPs and NPs.....                                 | 32 |
| 4.2.8 | Uptake studies in M1-MDMs.....                                                 | 39 |
| 4.2.9 | Investigation of the inhibition efficacy (5-LOX product formation assay) ..... | 40 |
| 5     | References.....                                                                | 40 |

## Index of Figures

|                                                                                                                                                                                                                                                                                                                                                                           |    |
|---------------------------------------------------------------------------------------------------------------------------------------------------------------------------------------------------------------------------------------------------------------------------------------------------------------------------------------------------------------------------|----|
| <b>Figure S1:</b> Formulation scheme for the preparation of the hybrid nanoparticles (HNP) via single-step nanoprecipitation technique. Image created with BioRender.com, accessed on 2 October 2023.                                                                                                                                                                     | 4  |
| <b>Figure S2:</b> Eluent composition and gradient programming of the developed HPLC method for the analysis of dual-loaded (with the drug BRP-201 and the NLO dye) s-PEG-PLGA NPs and lipid containing s-HNPs.                                                                                                                                                            | 7  |
| <b>Figure S3:</b> Flow cytometric analysis of CD14 expression of <b>A)</b> M <sub>0</sub> -MDMs and <b>B)</b> M <sub>1</sub> -MDMs. Human macrophages were stained with either FITC Mouse IgG2a, $\kappa$ Isotype Control (Cat. No. 555573; left plot) or FITC Mouse Anti-Human CD14 antibody (Cat. No. 555397/561712/557153; right plot) and analyzed using CytoFlex LX. | 8  |
| <b>Figure S4:</b> <b>(A)</b> Schematic representation of the structure of the polymer PLGA, lecithin (phosphatidylcholine), and the PEG-Lipid 1,2-distearoyl-sn-glycero-3-phosphoethanolamine (DSPE-PEG <sub>2000</sub> -X). <b>(B)</b> Schematic representation of the structure of different functionalities on the DSPE-PEG.                                           | 9  |
| <b>Figure S5:</b> Schematic representation of the chemical structure of <b>(A)</b> the dye NLO and <b>(B)</b> the drug BRP-201.                                                                                                                                                                                                                                           | 10 |
| <b>Figure S6:</b> Stability of HNPs regarding the presence of the surfactant poly(vinyl alcohol) (PVA).                                                                                                                                                                                                                                                                   | 13 |
| <b>Figure S7:</b> Size exclusion chromatography (SEC) analysis of the purified lyophilized HNPs.                                                                                                                                                                                                                                                                          | 13 |
| <b>Figure S8:</b> <b>(A)</b> Stability of HNPs and PEG-PLGA NPs in water over four weeks, <b>(B)</b> yield after filtration and <b>(C)</b> zeta potential in water and 0.01 M sodium chloride (NaCl) solution.                                                                                                                                                            | 14 |
| <b>Figure S9:</b> Particle size evaluation (number weighted value, $d_n$ ) by SEM image processing of dye loaded HNPs after purification.                                                                                                                                                                                                                                 | 15 |
| <b>Figure S10:</b> <b>(A)</b> Stability of HNPs and PEG-PLGA NPs in PBS buffer over one week and <b>(B)</b> stability of HNPs and PEG-PLGA in acetate buffer (Ac.buffer) over one week.                                                                                                                                                                                   | 17 |
| <b>Figure S11:</b> Enzymatic degradation of dye loaded HNPs and PEG-PLGA NPs (B-D) as well as dual loaded s- and l-HNPs, as well as s- and l-PEG-PLGA (E-H). HNP-COOH in PBS without proteinase K (A) and                                                                                                                                                                 |    |

particles mixed with a 1:2 ratio with proteinase K (B to H). Degradation was observed by monitoring the count rate and size by DLS.  $n = 1$ . 18

**Figure S12:** Uptake of the HNPs and PEG-PLGA NPs in  $M_0$ -MDMs at three different concentrations ( $1.8 \mu\text{g mL}^{-1}$  and  $18 \mu\text{g mL}^{-1}$  with  $n = 4$ ,  $180 \mu\text{g mL}^{-1}$  with  $n = 2$ ), reported as MFI and X-fold change as compared to the PEG-PLGA NPs. 20

**Figure S13:**  $M_1$ -MDMs uptake kinetics of the s-HNP-COOH and s-HNP-RGD as compared to s-PEG-PLGA NPs at a concentration of  $100 \mu\text{g mL}^{-1}$  and free NLO in DMSO at  $0.06 \mu\text{g mL}^{-1}$  (representative of the %LC of the HNP) using CLSM over 15 min (scale bar:  $10 \mu\text{m}$ , magnification;  $40\times$ ). 21

**Figure S14:** (A) Stability of the s-HNPs and s-PEG-PLGA in water over four weeks, (B) yield after purification and (C) zeta potential in water and  $0.01 \text{ M}$  sodium chloride (NaCl) solution. 24

**Figure S15:** (A) Stability of l-HNPs and l-PEG-PLGA in water over four weeks, (B) yield after purification and (C) zeta potential in water and  $0.01 \text{ M}$  sodium chloride (NaCl) solution. 24

**Figure S16:** Exact size distribution of s- and l-HNPs, as well as s- and l-PEG-PLGA with the standard deviation. Calculated using  $\sigma = \sqrt{PDI} \cdot d_{h,DLS}$ .<sup>[2]</sup> 25

**Figure S17:** SEM size evaluation of s-HNPs after purification by image processing. 26

**Figure S18:** SEM size evaluation of l-HNPs by image processing. 27

**Figure S19:** SEM images of l-HNPs and l-PEG-PLGA NPs before and after filtration through  $0.8 \mu\text{m}$  cellulose acetate filter. White rectangular box indicates the presence of BRP-201 precipitates in the formulations before the filtration procedure. 28

**Figure S20:** (A) BRP-201 and (B) NLO loading capacity (LC) of s- and l-HNPs, as well as s- and l-PEG-PLGA NPs. 29

**Figure S21:** Buffer stability of smaller particles: s-HNPs and s-PEG-PLGA in (A) PBS and (B) acetate buffer (Ac. buffer). 31

**Figure S22:** Buffer stability of l-HNPs and l-PEG-PLGA in (A) PBS and (B) acetate buffer (Ac. buffer). 31

**Figure S23:** (A) Elugram of dual loaded (with the drug BRP-201 and the dye NLO) s-PEG-PLGA NPs recorded by CAD. (B) Elugram of s-PEG-PLGA NPs recorded by DAD at  $312 \text{ nm}$ . The peak at  $3.7 \text{ min}$  refers to BRP-201. (C) Elugram of s-PEG-PLGA NPs recorded by FLD ( $\lambda_{\text{ex}} = 555 \text{ nm}$ ,  $\lambda_{\text{em}} = 592 \text{ nm}$ ). The peak at  $8.4 \text{ min}$  refers to NLO. Measurement conditions: Flow rate  $0.75 \text{ mL min}^{-1}$ ,  $\text{CH}_3\text{CN/water}$  with  $10 \text{ mM}$  ammonium acetate ( $\text{pH } 5.5$ )/ $\text{CH}_3\text{OH}$  with  $10 \text{ mM}$  ammonium acetate, gradient conditions can be found in **Figure S2**. 32

**Figure S24:** (A) Elugram of dual loaded (with the drug BRP-201 and the dye NLO) s-HNP-RGD recorded by CAD. (B) Elugrams of PLGA, DSPE-PEG-RGD, lecithin, and PVA standards. For simplicity of interpretation, the signal intensities of DSPE-PEG-RGD, lecithin, and PVA are multiplied with a factor of  $0.25$ . (C) Elugram of s-HNP-RGD recorded by DAD at  $312 \text{ nm}$ . Peak at  $3.7 \text{ min}$  refers to BRP-201. (D) Elugram of s-HNP-RGD recorded by FLD ( $\lambda_{\text{ex}} = 555 \text{ nm}$ ,  $\lambda_{\text{em}} = 592 \text{ nm}$ ). The peak at  $8.4 \text{ min}$  refers to NLO. Measurement conditions: Flow rate  $0.75 \text{ mL min}^{-1}$ ,  $\text{CH}_3\text{CN/water}$  with  $10 \text{ mM}$  ammonium acetate ( $\text{pH } 5.5$ )/ $\text{CH}_3\text{OH}$  with  $10 \text{ mM}$  ammonium acetate. The gradient conditions can be found in **Figure S2**. 33

**Figure S25:** (A) Elugram of dual loaded (with the drug BRP-201 and the dye NLO) s-HNP-COOH recorded by CAD. (B) Elugrams of PLGA, DSPE-PEG-COOH, lecithin, and PVA standards. For simplicity of interpretation, the signal intensities of DSPE-PEG-COOH, lecithin, and PVA are multiplied with a factor of  $0.25$ . (C) Elugram of s-HNP-COOH recorded by DAD at  $312 \text{ nm}$ . Peak at  $3.7 \text{ min}$  refers to BRP-201. (D) Elugram of s-HNP-COOH recorded by FLD ( $\lambda_{\text{ex}} = 555 \text{ nm}$ ,  $\lambda_{\text{em}} = 592 \text{ nm}$ ). The peak at  $8.4 \text{ min}$  refers to NLO. Measurement conditions: Flow rate  $0.75 \text{ mL min}^{-1}$ ,  $\text{CH}_3\text{CN/water}$  with  $10 \text{ mM}$  ammonium acetate ( $\text{pH } 5.5$ )/ $\text{CH}_3\text{OH}$  with  $10 \text{ mM}$  ammonium acetate. The gradient conditions can be found in **Figure S2**. 34

**Figure S26:** (A) Elugram of dual loaded (with the drug BRP-201 and the dye NLO) s-HNP-COOH/RGD(1:1) recorded by CAD. (B) Elugrams of PLGA, DSPE-PEG-COOH, DSPE-PEG-RGD, lecithin,

and PVA standards. For simplicity of interpretation, the signal intensities of DSPE-PEG-COOH, DSPE-PEG-RGD, lecithin, and PVA are multiplied with a factor of 0.25. (C) Elugram of s-HNP-COOH/RGD(1:1) recorded by DAD at 312 nm. Peak at 3.7 min refers to BRP-201. (D) Elugram of s-HNP-COOH/RGD(1:1) recorded by FLD ( $\lambda_{\text{ex}} = 555 \text{ nm}$ ,  $\lambda_{\text{em}} = 592 \text{ nm}$ ). The peak at 8.4 min refers to NLO. Measurement conditions: Flow rate  $0.75 \text{ mL min}^{-1}$ ,  $\text{CH}_3\text{CN}/\text{water}$  with 10 mM ammonium acetate (pH 5.5)/  $-\text{CH}_3\text{OH}$  with 10 mM ammonium acetate. The gradient conditions can be found in **Figure S2**. 35

**Figure S27:** (A) Elugram of dual loaded (with the drug BRP-201 and the dye NLO) s-HNP-COOH/RGD(2:1) recorded by CAD. (B) Elugrams of PLGA, DSPE-PEG-COOH, DSPE-PEG-RGD, lecithin, and PVA standards. For simplicity of interpretation, the signal intensities of DSPE-PEG-COOH, DSPE-PEG-RGD, lecithin, and PVA are multiplied with a factor of 0.25. (C) Elugram of s-HNP-COOH/RGD(2:1) recorded by DAD at 312 nm. Peak at 3.7 min refers to BRP-201. (D) Elugram of s-HNP-COOH/RGD(2:1) recorded by FLD ( $\lambda_{\text{ex}} = 555 \text{ nm}$ ,  $\lambda_{\text{em}} = 592 \text{ nm}$ ). The peak at 8.4 min refers to NLO. Measurement conditions: Flow rate  $0.75 \text{ mL min}^{-1}$ ,  $\text{CH}_3\text{CN}/\text{water}$  with 10 mM ammonium acetate (pH 5.5)/  $\text{CH}_3\text{OH}$  with 10 mM ammonium acetate. The gradient conditions can be found in **Figure S2**. 36

**Figure S28:** (A) Calibration curve for BRP-201 and (B) double-logarithmic calibration curve for PLGA presented by plotting peak areas as a function of analyte concentrations. Data were fitted linearly. Data were collected at the same elution conditions as shown in **Figure S2**. 37

**Figure S29:** Elution repeatability experiment by five successive injections of s-HNP-COOH recorded by CAD. Measurement conditions: Flow rate  $0.75 \text{ mL min}^{-1}$ ,  $\text{CH}_3\text{CN}/\text{water}$  with 10 mM ammonium acetate (pH 5.5)/  $\text{CH}_3\text{OH}$  with 10 mM ammonium acetate. The gradient conditions can be found in **Figure S2**. 37

**Figure S30:** Uptake of the s- and l-HNPs as compared to s- and l-PEG-PLGA NPs (P10-P19) in  $\text{M}_1$ -MDMs at a concentration of  $100 \mu\text{g mL}^{-1}$  ( $n = 2$ ), reported as X-fold change as compared to the s-PEG-PLGA NPs. 39

## 2 Methods

### 2.1 Formulation Method for HNPs

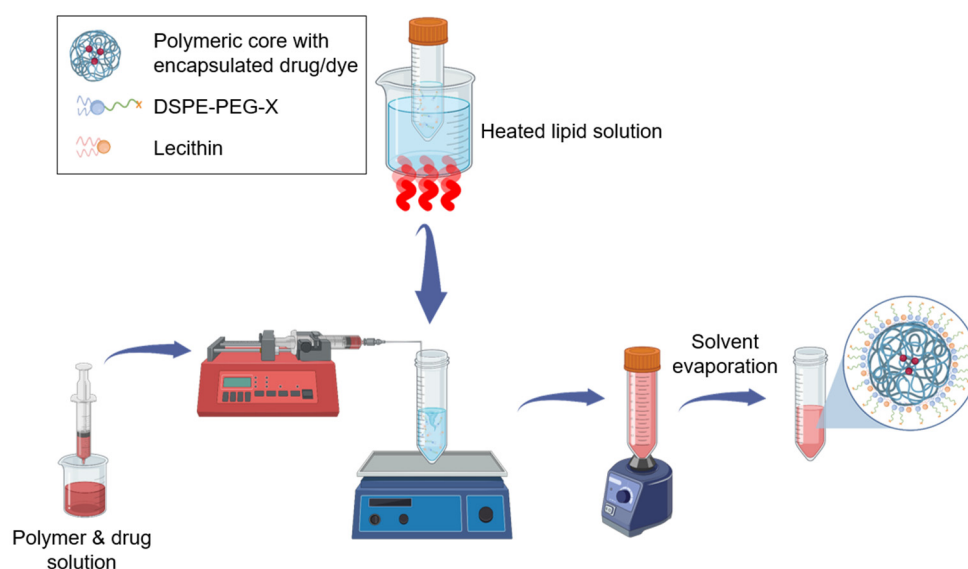

**Figure S1:** Formulation scheme for the preparation of the hybrid nanoparticles (HNP) via single-step nanoprecipitation technique. Image created with BioRender.com, accessed on 2 October 2023.



## 2.2 Analyses of Particle Size Distributions in SEM Images Using OpenCV in Python

Analyzing the size distribution of particles in SEM images is a critical task in various scientific and industrial applications. OpenCV in Python offers a powerful set of tools for preprocessing and particle detection. By following the algorithm outlined in this article, the analysis process can be automated leading to the valuable insights about the size distribution of particles within SEM images. Our algorithm involves a series of preprocessing steps and an iterative approach to detect particles until no more are found in the image.

### Preprocessing steps

Before we can analyze the particle sizes in SEM images, it is crucial to ensure that the images are properly preprocessed:

- 1. Histogram equalization:** One common preprocessing step is histogram adjustment. It is a method to enhance the contrast in an image. It redistributes the intensity values of pixels in the image to cover the entire intensity range. SEM images can often have varying brightness and contrast, making it difficult to distinguish particles. Histogram adjustment can help improve the image quality.
- 2. Min-Max normalization:** Normalization is a crucial preprocessing step that aims to standardize the intensity values of the SEM image. Min-max scaling transforms pixel values to the range [0, 1]. This step ensures that all images are on a common scale.
- 3. Adaptive thresholding:** After histogram equalization and normalization, we can apply adaptive thresholding to create a binary image. This helps in segmenting the particles from the background. The adaptive thresholding allows us to adaptively determine the threshold for each local region of the image.

### Particle Detection Algorithm: Iterative Particle Detection

The heart of the particle size distribution analysis lies in detecting and measuring the particles present in the SEM image. This algorithm works iteratively until no more particles are detected in the image.

Here are the key steps involved:

- 1. Particle detection:** Initial step is to detect particles in the preprocessed image. This can be achieved through contour detection. The contours represent the boundaries of the particles. The better the images are preprocessed in a way that the contrast between particle edges and its surrounding particles or the background are enhanced, the better contour detection step will work which leads to more precise particle detection.
- 2. Particle measurement:** For each detected contour, we can calculate various properties, including the area, perimeter, diameter, and centroid. These properties are crucial for determining the size and location of each particle.
- 3. Filtering by size:** At this point, we can filter out particles based on their size. You can set a size range that is relevant to your analysis. In case of our study we considered the particles with diameters between 10 to 1000 nm. Particles falling within this range are retained, while others are discarded.
- 4. Masking and removal:** After filtering, we create a binary mask that represents the particles we want to retain. This mask is used to remove the detected particles from the image, leaving only the remaining particles for further analysis.

**5. Iterative process:** Repeat the above steps on the modified image (after removing detected particles) until no more particles are detected. This iterative approach ensures that “all” the particles are accounted for in the analysis.

**6. Final size distribution:** At the end of the analysis, while having all the desired masks of the particles, we can calculate:

- The diameter of largest possible circle that can be inscribed inside each selected mask
- The diameter of smallest possible circle that can be circumscribed outside each selected mask
- And the average of both above

in pixel number or by having the pixel size of each SEM image in nanometers. By doing this we can be assure of a more robust and trustworthy analysis.

**7. Plots:** Here, in parallel with displaying the selected contours inside the SEM image as a separate graph, we employed boxplot and histogram to analyze the distribution of the sizes. A boxplot, also known as a box-and-whisker plot, is a graphical representation of the distribution of a dataset. It provides a summary of the key statistical measures, including the median, quartiles, and potential outliers. To construct a boxplot, a rectangular box is drawn, representing the interquartile range (IQR) between the first and third quartiles (Q1 and Q3). A line inside the box denotes the median. Whiskers extend from the box to the minimum and maximum values within a specified range or to a certain multiple of the IQR and the outliers beyond the whiskers. Even though taken into the account for mean values, outliers were individually plotted as circles. Histogram plots illustrates the frequency distribution by dividing the variable range into bins, with bar height representing observation frequency. Both plots provide a comprehensive understanding of the size distribution, aiding a better result interpretation.

## 2.3 HPLC Analysis of HNPS

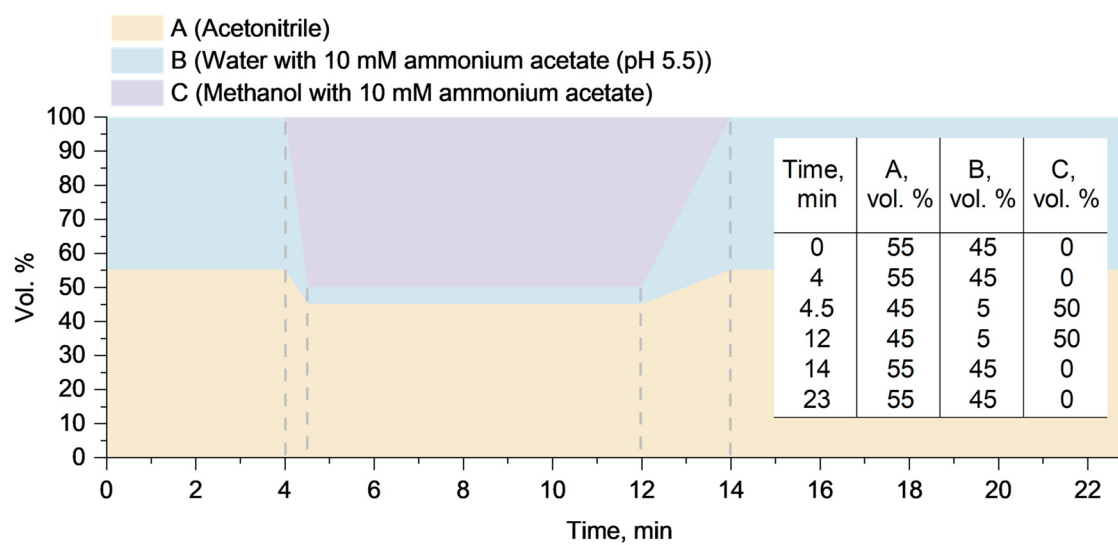

**Figure S2:** Eluent composition and gradient programming of the developed HPLC method for the analysis of dual-loaded (with the drug BRP-201 and the NLO dye) s-PEG-PLGA NPs and lipid containing s-HNPs.

## 2.4 CD14 FITC Staining of Isolated Macrophages

To determine the purity of the isolated macrophages, and clearly discriminate the targeted cells, a cell staining protocol was followed as previously described by Zhang *et al.* (2022). Briefly, prior to staining the cells, non-specific binding of antibodies was blocked by using mouse serum (10 min at 4 °C). Then, cells were stained with either FITC anti-human CD14 (20 µl/test, clone M5E2, catalogue no: 555397, BD Biosciences, Franklin Lakes, NJ, USA) or FITC Mouse IgG2a,  $\kappa$  Isotype Control (Clone G155-178, catalogue no: 554647, BD Biosciences, Heidelberg, Germany) for 20 min at 4 °C.<sup>[1]</sup> Analysis was performed using the CytoFlex LX (Beckman Coulter GmbH, Krefeld, Germany), and data was analyzed using the CytExpert Software.

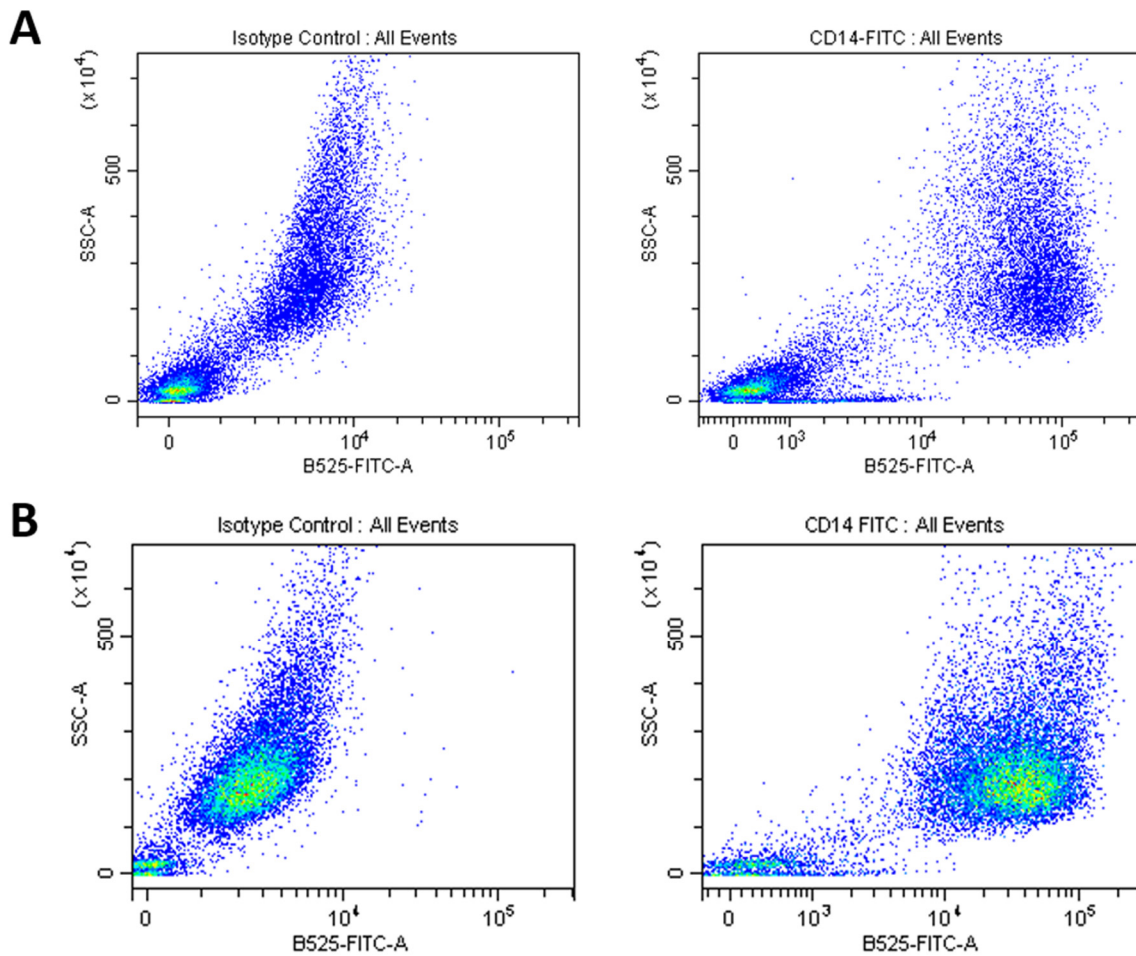

**Figure S3:** Flow cytometric analysis of CD14 expression of **A)** M<sub>0</sub>-MDMs and **B)** M<sub>1</sub>-MDMs. Human macrophages were stained with either FITC Mouse IgG2a,  $\kappa$  Isotype Control (Cat. No. 555573; left plot) or FITC Mouse Anti-Human CD14 antibody (Cat. No. 555397/561712/557153; right plot) and analyzed using CytoFlex LX.

### 3 Materials

#### 3.1 HNP components: Polymers, lipids and PEG-Lipids

**A**

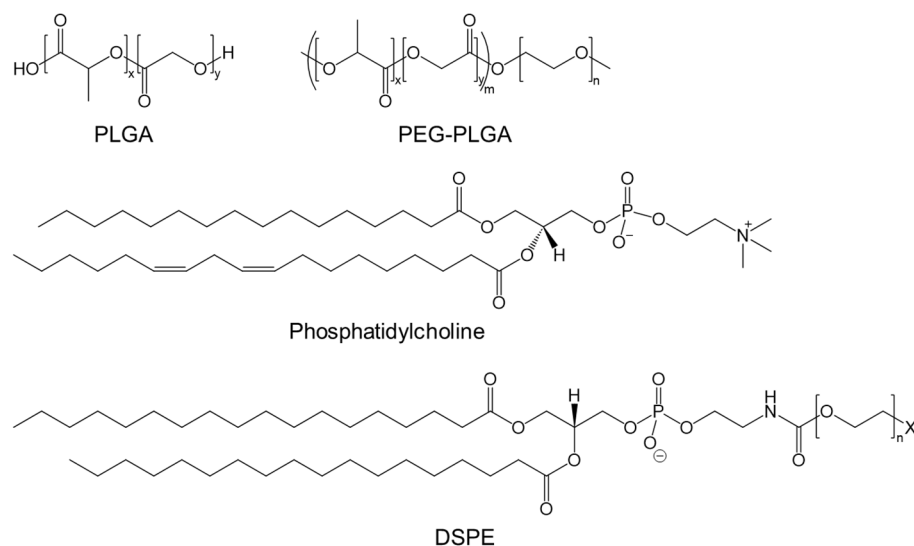

**B**

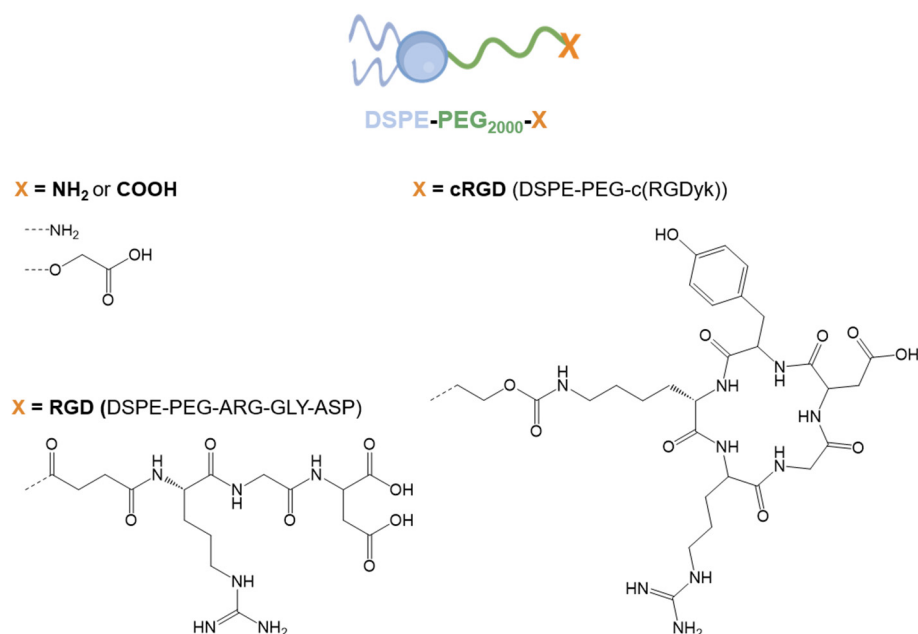

**Figure S4:** (A) Schematic representation of the structure of the polymer PLGA, lecithin (phosphatidylcholine), and the PEG-Lipid 1,2-distearoyl-sn-glycero-3-phosphoethanolamine (DSPE-PEG<sub>2000</sub>-X). (B) Schematic representation of the structure of different functionalities on the DSPE-PEG.

### 3.2 Cargo molecules (dye and drug)

**A**

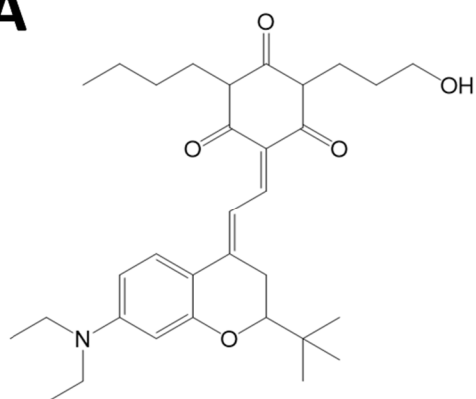

Neutral lipid orange

**B**

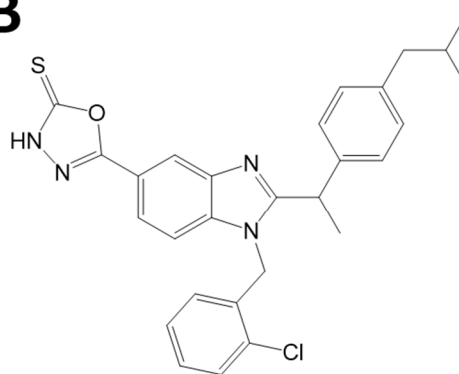

BRP-201

**Figure S5:** Schematic representation of the chemical structure of **(A)** the dye NLO and **(B)** the drug BRP-201.

## 4 Results

### 4.1 HNPs and NLO Loaded HNPs

#### 4.1.1 Formulation

**Table S1:** Formulation parameters of HNPs and NLO loaded HNPs.

| P#                     | Sample                        | Polymer            | C <sub>Polymer</sub><br>[mg mL <sup>-1</sup> ] | PEG-Lipid                | Lipid    | Cargo | S/W | PVA<br>[wt%] |
|------------------------|-------------------------------|--------------------|------------------------------------------------|--------------------------|----------|-------|-----|--------------|
| P1                     | HNP-NH <sub>2</sub> [w/o PVA] | PLGA               | 2.5                                            | DSPE-PEG-NH <sub>2</sub> | Lecithin | -     | 1:6 | -            |
| P2                     | HNP-COOH[w/o PVA]             | PLGA               | 2.5                                            | DSPE-PEG-COOH            | Lecithin | -     | 1:6 | -            |
| P3                     | HNP-NH <sub>2</sub>           | PLGA               | 2.5                                            | DSPE-PEG-NH <sub>2</sub> | Lecithin | -     | 1:6 | 5            |
| P4                     | HNP-COOH                      | PLGA               | 2.5                                            | DSPE-PEG-COOH            | Lecithin | -     | 1:6 | 5            |
| <b>NLO loaded HNPs</b> |                               |                    |                                                |                          |          |       |     |              |
| <sup>a</sup> P5        | HNP-NH <sub>2</sub>           | PLGA               | 2.5                                            | DSPE-PEG-NH <sub>2</sub> | Lecithin | NLO   | 1:6 | 10           |
| <sup>a</sup> P6        | HNP-COOH                      | PLGA               | 2.5                                            | DSPE-PEG-COOH            | Lecithin | NLO   | 1:6 | 5            |
| <sup>a</sup> P7        | HNP-RGD                       | PLGA               | 2.5                                            | DSPE-PEG-RGD             | Lecithin | NLO   | 1:6 | 5            |
| <sup>a</sup> P8        | HNP-cRGD                      | PLGA               | 2.5                                            | DSPE-PEG-cRGD            | Lecithin | NLO   | 1:6 | 5            |
| <sup>a</sup> P9        | PEG-PLGA                      | PEG-PLGA:PLGA(1:2) | 2.5                                            | -                        | -        | NLO   | 1:6 | 5            |

Solvent to water ratio (S/W). The polymer was dissolved in CH<sub>3</sub>CN, the dye was dissolved in DMSO, the lipids were dissolved in a 4 wt% ethanol in water solution. The lipid to polymer ratio (L/P ratio) was always 15 wt% referred to the polymer mass. The initial amount of dye NLO was 0.1 wt%. <sup>a</sup>Formulation performed with n = 5.

#### 4.1.2 Particle characteristics

**Table S2:** DLS and ELS data, stability over time in water, yield and LC values from HNPs and NLO loaded HNPs.

| P#                     | Sample                        | d <sub>H</sub> [nm] (PDI) after purification | ζ in water [mV] | ζ in NaCl [mV] | d <sub>H</sub> [nm] (PDI) after 2 weeks | d <sub>H</sub> [nm] (PDI) after 4 weeks | Yield [%] | LC <sub>NLO</sub> [%] | d <sub>H</sub> [nm] (PDI) after filtration <sup>n=1</sup> | LC <sub>NLO</sub> after filtration [%] <sup>n=1</sup> |
|------------------------|-------------------------------|----------------------------------------------|-----------------|----------------|-----------------------------------------|-----------------------------------------|-----------|-----------------------|-----------------------------------------------------------|-------------------------------------------------------|
| P1                     | HNP-NH <sub>2</sub>           | 138 (0.26)                                   | -25             | -2             | 146 (0.26)                              | 403 (0.38)                              | 44        | -                     | -                                                         | -                                                     |
| P2                     | HNP-COOH                      | 130 (0.18)                                   | -38             | -22            | 136 (0.14)                              | 129 (0.16)                              | 58        | -                     | -                                                         | -                                                     |
| P3                     | HNP-NH <sub>2</sub> [w/o PVA] | 153 (0.28)                                   | -11             | -2             | 189 (0.32)                              | 802 (0.58)                              | 27        | -                     | -                                                         | -                                                     |
| P4                     | HNP-COOH[w/o PVA]             | 126 (0.17)                                   | -40             | -34            | 127 (0.16)                              | 124 (0.15)                              | 71        | -                     | -                                                         | -                                                     |
| <b>NLO loaded HNPs</b> |                               |                                              |                 |                |                                         |                                         |           |                       |                                                           |                                                       |
| <sup>a</sup> P5        | HNP-NH <sub>2</sub>           | 157(0.17)                                    | -20             | -2             | 152 (0.17)                              | 166 (0.17)                              | 47        | 0.06                  | 143 (0.09)                                                | 0.06                                                  |
| <sup>a</sup> P6        | HNP-COOH                      | 146 (0.13)                                   | -35             | -19            | 140 (0.12)                              | 139 (0.13)                              | 67        | 0.08                  | 133 (0.15)                                                | 0.07                                                  |
| <sup>a</sup> P7        | HNP-RGD                       | 146 (0.14)                                   | -35             | -14            | 140 (0.13)                              | 140 (0.13)                              | 72        | 0.08                  | 131 (0.11)                                                | 0.06                                                  |
| <sup>a</sup> P8        | HNP-cRGD                      | 166 (0.24)                                   | -29             | -6             | 151 (0.18)                              | 147 (0.16)                              | 41        | 0.07                  | 141 (0.16)                                                | 0.07                                                  |
| <sup>a</sup> P9        | PEG-PLGA                      | 118 (0.08)                                   | -14             | -4             | 116 (0.08)                              | 115 (0.07)                              | 64        | 0.05                  | 116 (0.07)                                                | 0.05                                                  |

Hydrodynamic diameter (d<sub>H</sub>), polydispersity index (PDI), zeta potential (ζ), loading capacity (LC). <sup>a</sup>Formulation performed with n = 5.



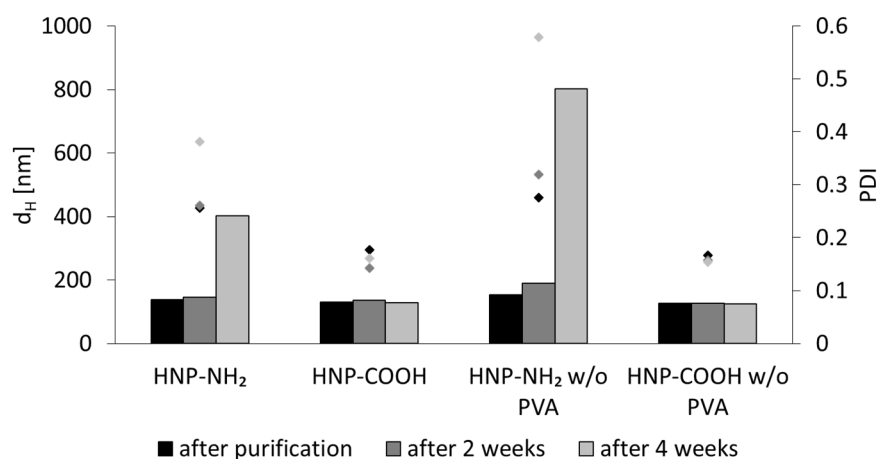

**Figure S6:** Stability of HNPs regarding the presence of the surfactant poly(vinyl alcohol) (PVA).

#### 4.1.3 SEC analysis

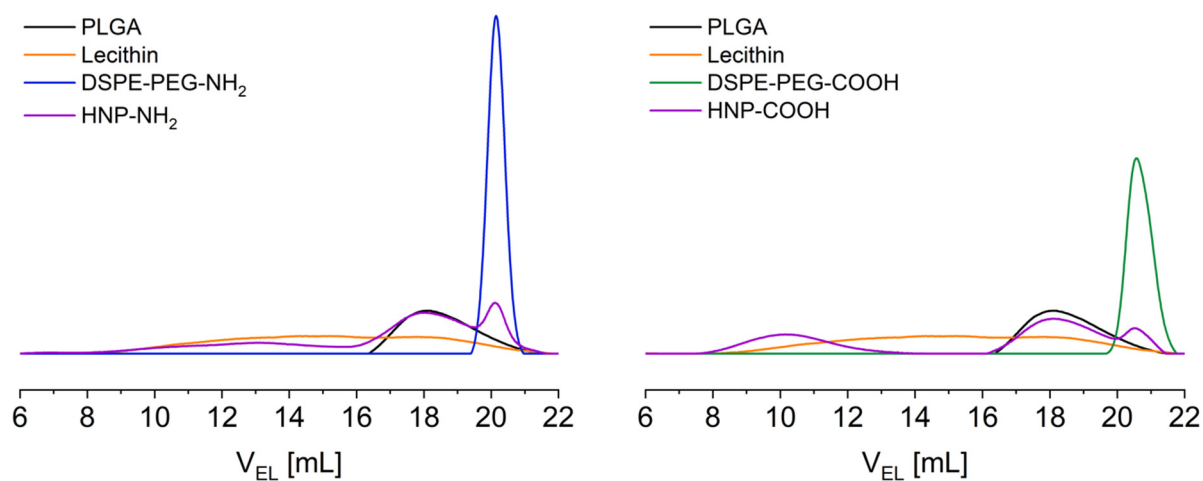

**Figure S7:** Size exclusion chromatography (SEC) analysis of the purified lyophilized HNPs.

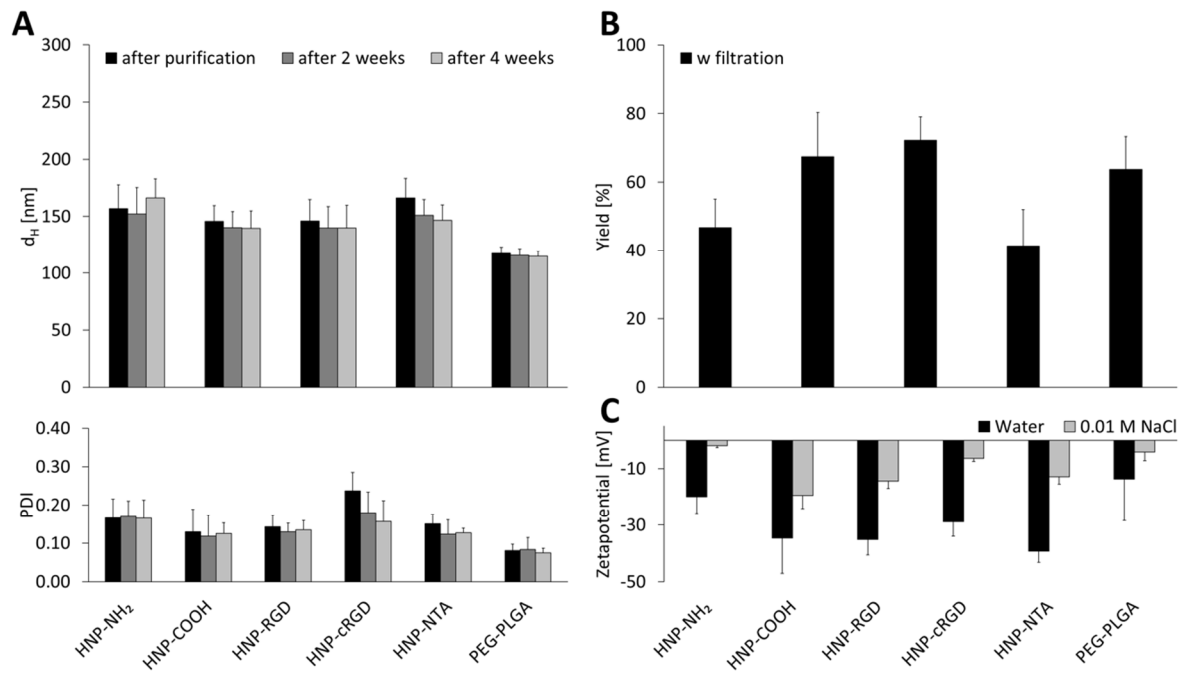

**Figure S8:** (A) Stability of HNPs and PEG-PLGA NPs in water over four weeks, (B) yield after filtration and (C) zeta potential in water and 0.01 M sodium chloride (NaCl) solution.

#### 4.1.4 Particle size distribution analysis from SEM images

HNP-NH<sub>2</sub>

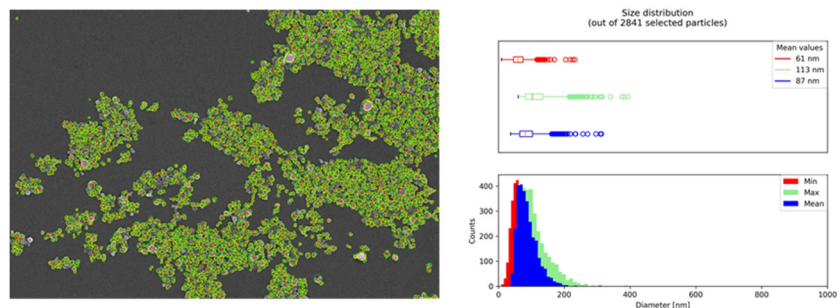

HNP-COOH

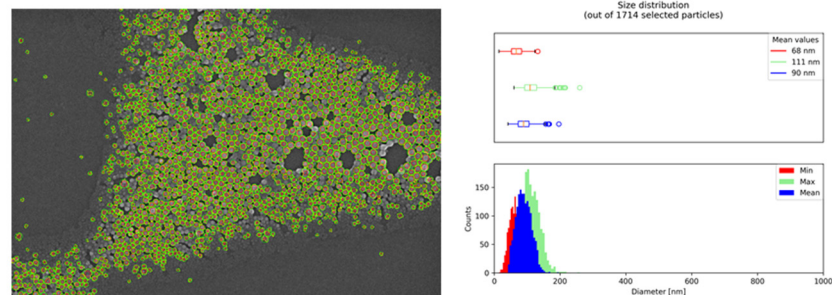

HNP-RGD

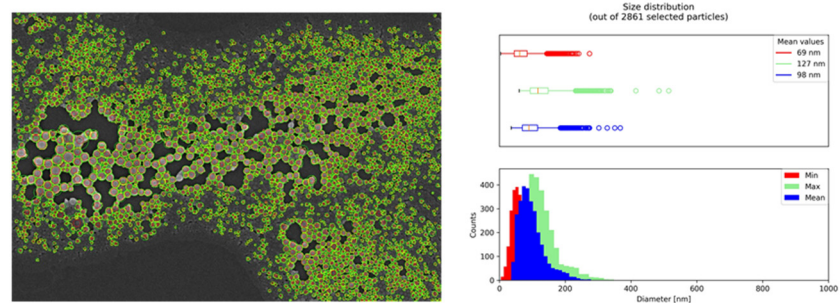

HNP-cRGD

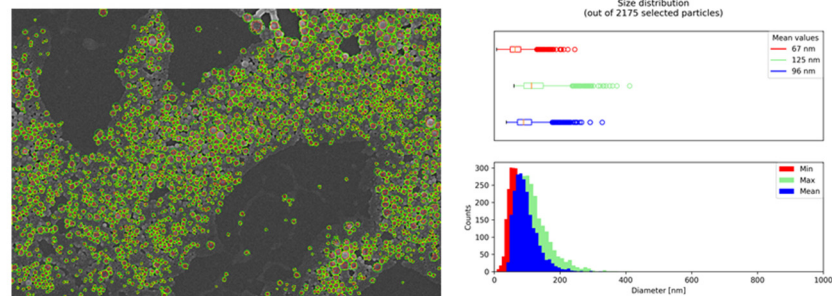

PEG-PLGA

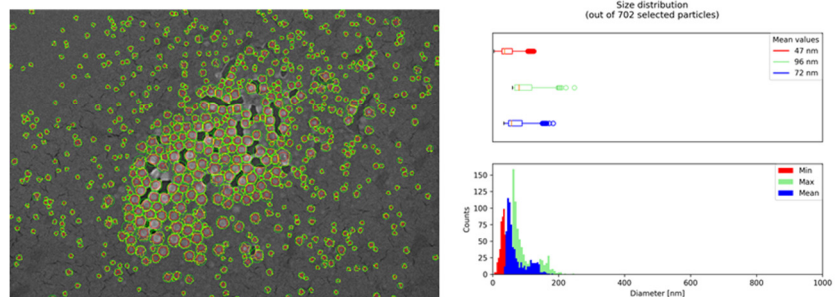

**Figure S9:** Particle size evaluation (number weighted value,  $d_N$ ) by SEM image processing of dye loaded HNPs after purification.

#### 4.1.5 Stability in PBS and in acetate buffer

**Table S3:** DLS data of all formulations measured in PBS and in acetate buffer (Ac. buffer).

| P#                     | Sample                        | d <sub>H</sub> [nm] (PDI)<br>PBS | d <sub>H</sub> [nm] (PDI)<br>PBS<br>24 h | d <sub>H</sub> [nm] (PDI)<br>PBS<br>1 week | d <sub>H</sub> [nm] (PDI)<br>Ac.buffer | d <sub>H</sub> [nm]<br>(PDI)<br>Ac.buffer 24 h | d <sub>H</sub> [nm]<br>(PDI)<br>Ac.buffer<br>1 week |
|------------------------|-------------------------------|----------------------------------|------------------------------------------|--------------------------------------------|----------------------------------------|------------------------------------------------|-----------------------------------------------------|
| P1                     | HNP-NH <sub>2</sub> [w/o PVA] | 154 (0.25)                       | -                                        | -                                          | 130 (0.20)                             | -                                              | -                                                   |
| P2                     | HNP-COOH[w/o PVA]             | 126 (0.12)                       | -                                        | -                                          | 128 (0.10)                             | -                                              | -                                                   |
| P3                     | HNP-NH <sub>2</sub>           | 1136 (0.14)                      | -                                        | -                                          | 138 (0.22)                             | -                                              | -                                                   |
| P4                     | HNP-COOH                      | 119 (0.11)                       | -                                        | -                                          | 124 (0.10)                             | -                                              | -                                                   |
| <b>NLO loaded HNPs</b> |                               |                                  |                                          |                                            |                                        |                                                |                                                     |
| <sup>a</sup> P5        | HNP-NH <sub>2</sub>           | 150 (0.09)                       | 203 (0.31)                               | 225 (0.38)                                 | 141 (0.09)                             | 153 (0.07)                                     | 157 (0.10)                                          |
| <sup>a</sup> P6        | HNP-COOH                      | 130 (0.09)                       | 130 (0.09)                               | 126 (0.08)                                 | 134 (0.08)                             | 131 (0.07)                                     | 128 (0.08)                                          |
| <sup>a</sup> P7        | HNP-RGD                       | 139 (0.11)                       | 135 (0.06)                               | 129 (0.07)                                 | 242 (0.09)                             | 139 (0.08)                                     | 138 (0.10)                                          |
| <sup>a</sup> P8        | HNP-cRGD                      | 146 (0.15)                       | 139 (0.17)                               | 139 (0.15)                                 | 161 (0.17)                             | 183 (0.18)                                     | 197 (0.21)                                          |
| <sup>a</sup> P9        | PEG-PLGA                      | 116 (0.05)                       | 119 (0.07)                               | 118 (0.08)                                 | 116 (0.05)                             | 119 (0.06)                                     | 120 (0.07)                                          |

Hydrodynamic diameter (d<sub>H</sub>), polydispersity index (PDI), phosphate-buffered saline (PBS), acetate buffer (Ac.buffer). <sup>a</sup>Formulation performed with n = 5.

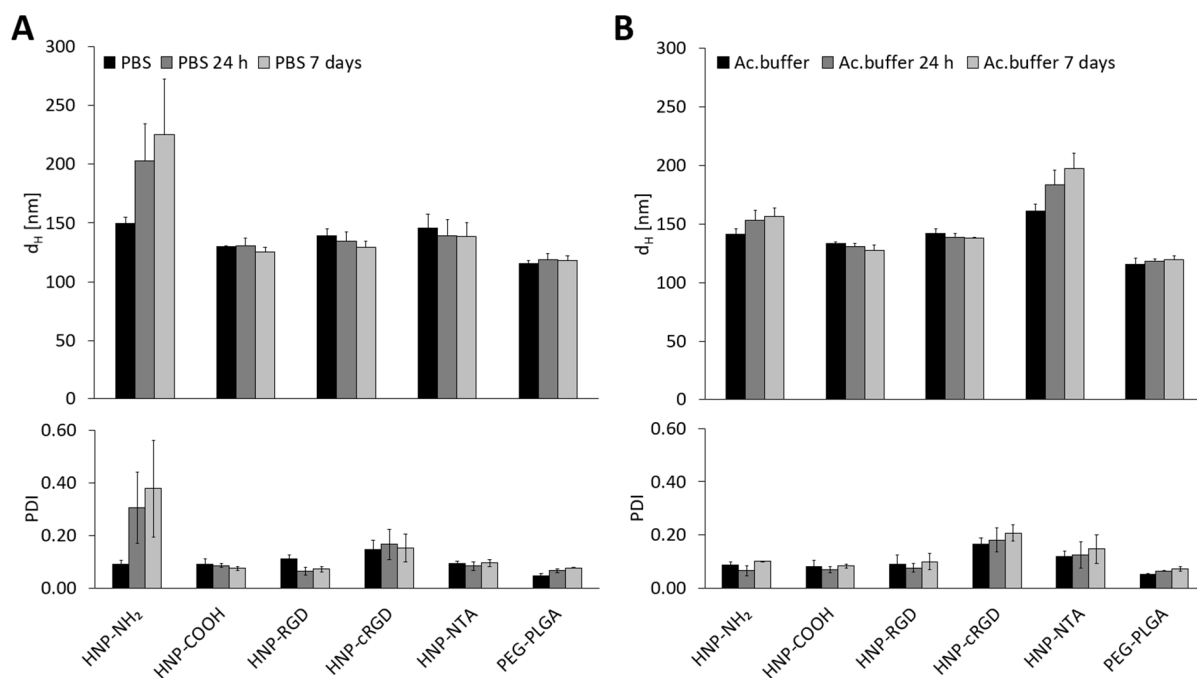

**Figure S10: (A)** Stability of HNPs and PEG-PLGA NPs in PBS buffer over one week and **(B)** stability of HNPs and PEG-PLGA in acetate buffer (Ac.buffer) over one week.

#### 4.1.6 Degradation of HNPs

##### HNPs loaded with NLO

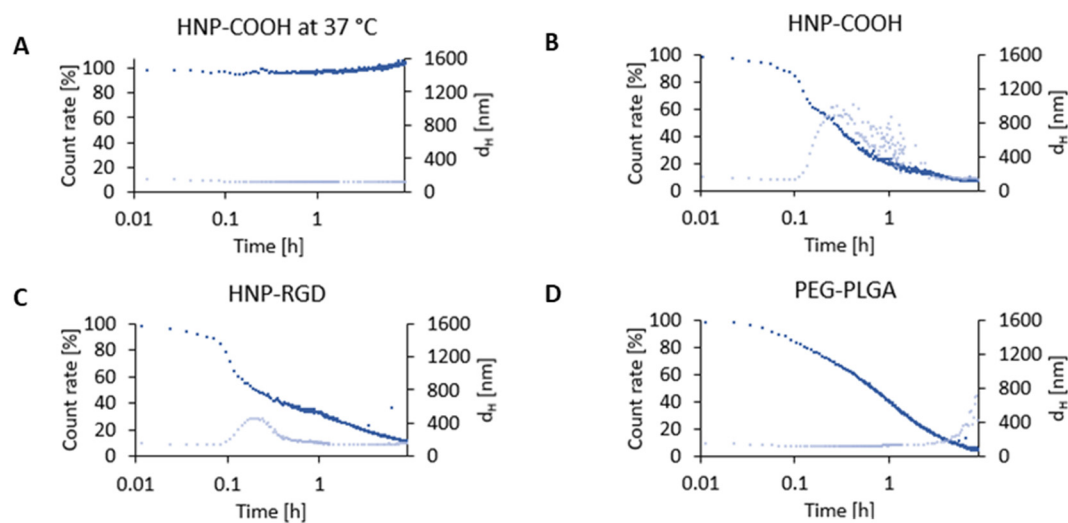

##### HNPs loaded with NLO and BRP-201

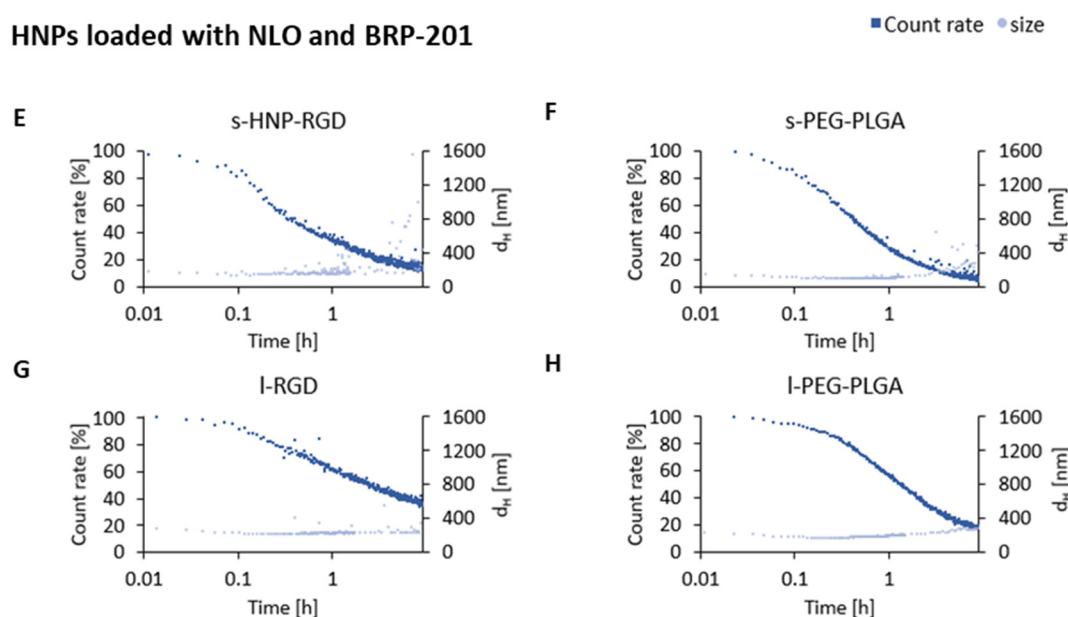

**Figure S11:** Enzymatic degradation of dye loaded HNPs and PEG-PLGA NPs (B-D) as well as dual loaded s- and I-HNPs, as well as s- and I-PEG-PLGA (E-H). HNP-COOH in PBS without proteinase K (A) and particles mixed with a 1:2 ratio with proteinase K (B to H). Degradation was observed by monitoring the count rate and size by DLS. n = 1.

#### 4.1.7 Cytotoxicity studies

**Table S4:** Measurement data of the cytotoxicity studies of dye loaded HNPs and PEG-PLGA nanoparticles on M<sub>0</sub>-MDMs at three different concentrations (180, 18 and 1.8  $\mu\text{g mL}^{-1}$ ) after 24 h reported as average metabolic activity [%]. n = 4 of one formulation batch.

| P# | Sample              | Metabolic Activity [%]<br>$C_{\text{HNP}} = 1.8 \mu\text{g mL}^{-1}$ | Metabolic Activity [%]<br>$C_{\text{HNP}} = 18 \mu\text{g mL}^{-1}$ | Metabolic Activity [%]<br>$C_{\text{HNP}} = 180 \mu\text{g mL}^{-1}$ |
|----|---------------------|----------------------------------------------------------------------|---------------------------------------------------------------------|----------------------------------------------------------------------|
| P5 | HNP-NH <sub>2</sub> | 104.0                                                                | 94.4                                                                | 103.9                                                                |
| P6 | HNP-COOH            | 100.3                                                                | 98.0                                                                | 102.7                                                                |
| P7 | HNP-RGD             | 98.9                                                                 | 94.0                                                                | 98.2                                                                 |
| P8 | HNP-cRGD            | 97.2                                                                 | 99.3                                                                | 104.3                                                                |
| P9 | PEG-PLGA            | 102.0                                                                | 101.7                                                               | 104.2                                                                |

#### 4.1.8 Uptake studies in M0-MDMs

**Table S5:** Measurement data of the uptake studies of dye loaded HNPs and PEG-PLGA NPs in M<sub>0</sub>-MDMs at three different concentrations (1.8 and 18  $\mu\text{g mL}^{-1}$  with  $n = 4$ , 180  $\mu\text{g mL}^{-1}$  with  $n = 2$ ) reported as mean fluorescence intensity (MFI) corrected for the fluorescence of the particle samples.

| P# | Sample              | Corrected MFI<br>$c_{\text{HNP}} = 1.8 \mu\text{g mL}^{-1}$ | Corrected MFI<br>$c_{\text{HNP}} = 18 \mu\text{g mL}^{-1}$ | Corrected MFI<br>$c_{\text{HNP}} = 180 \mu\text{g mL}^{-1}$ |
|----|---------------------|-------------------------------------------------------------|------------------------------------------------------------|-------------------------------------------------------------|
| P5 | HNP-NH <sub>2</sub> | 43750                                                       | 394924                                                     | 3759375                                                     |
| P6 | HNP-COOH            | 39956                                                       | 300502                                                     | 3971806                                                     |
| P7 | HNP-RGD             | 39264                                                       | 234807                                                     | 3288117                                                     |
| P8 | HNP-cRGD            | 42565                                                       | 290119                                                     | 2772436                                                     |
| P9 | PEG-PLGA            | 2474                                                        | 138081                                                     | 1285226                                                     |

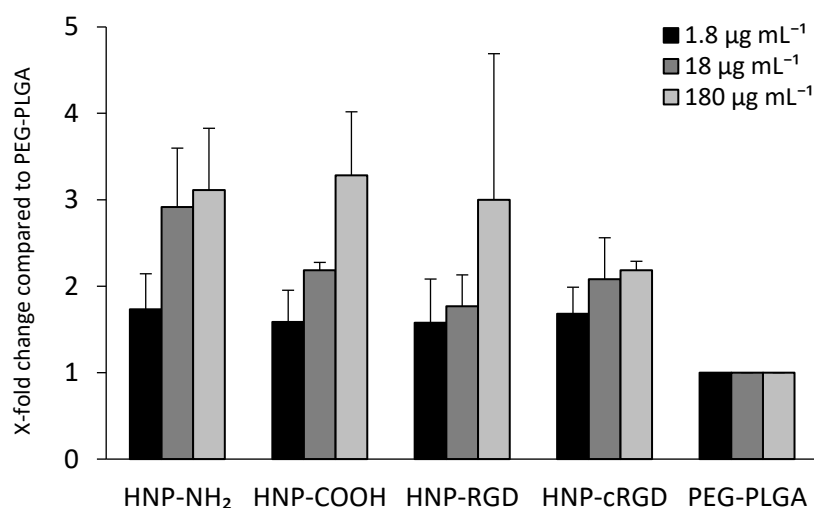

**Figure S12:** Uptake of the HNPs and PEG-PLGA NPs in M<sub>0</sub>-MDMs at three different concentrations (1.8  $\mu\text{g mL}^{-1}$  and 18  $\mu\text{g mL}^{-1}$  with  $n = 4$ , 180  $\mu\text{g mL}^{-1}$  with  $n = 2$ ), reported as MFI and X-fold change as compared to the PEG-PLGA NPs.



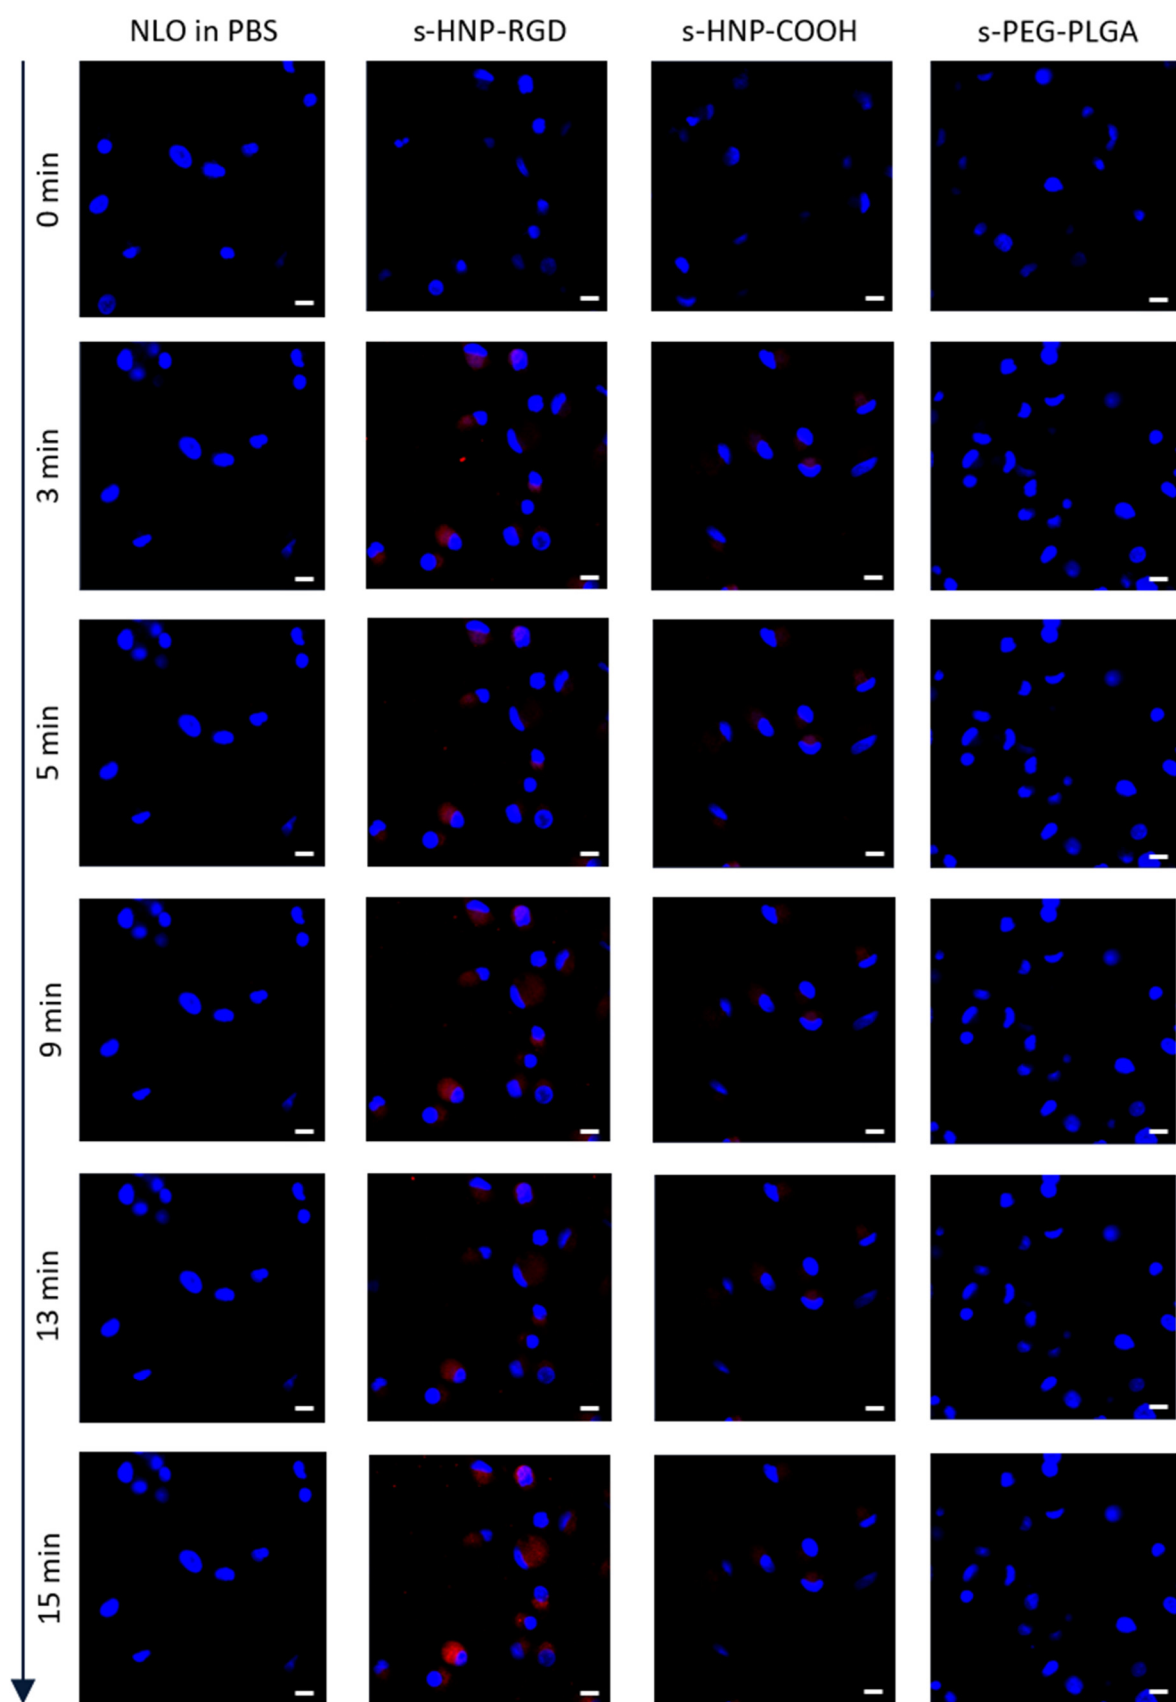

**Figure S13:** M<sub>1</sub>-MDMs uptake kinetics of the s-HNP-COOH and s-HNP-RGD as compared to s-PEG-PLGA NPs at a concentration of  $100 \mu\text{g mL}^{-1}$  and free NLO in DMSO at  $0.06 \mu\text{g mL}^{-1}$  (representative of the %LC of the HNP) using CLSM over 15 min (scale bar:  $10 \mu\text{m}$ , magnification;  $40\times$ ).

## 4.2 Dual Loaded PEG-Lipid-PLGA HNPs with Different Sizes and Functionalities

### 4.2.1 Formulation

**Table S6:** Formulation parameters of HNPs loaded with BRP-201 and NLO dye.

| P#                       | Sample              | Polymer            | C <sub>Polymer</sub><br>[mg mL <sup>-1</sup> ] | PEG-Lipid                         | Lipid    | Cargo         | S/W   | PVA<br>[wt%] |
|--------------------------|---------------------|--------------------|------------------------------------------------|-----------------------------------|----------|---------------|-------|--------------|
| <b>Smaller particles</b> |                     |                    |                                                |                                   |          |               |       |              |
| <sup>a</sup> P10         | s-HNP-COOH          | PLGA               | 2.5                                            | DSPE-PEG-COOH                     | Lecithin | BRP-201 + NLO | 1:6   | 25           |
| <sup>a</sup> P11         | s-HNP-RGD           | PLGA               | 2.5                                            | DSPE-PEG-RGD                      | Lecithin | BRP-201 + NLO | 1:6   | 25           |
| <sup>a</sup> P12         | s-HNP-COOH/RGD(1:1) | PLGA               | 2.5                                            | DSPE-PEG-COOH: DSPE-PEG-RGD (1:1) | Lecithin | BRP-201 + NLO | 1:6   | 25           |
| <sup>a</sup> P13         | s-HNP-COOH/RGD(2:1) | PLGA               | 2.5                                            | DSPE-PEG-COOH: DSPE-PEG-RGD (2:1) | Lecithin | BRP-201 + NLO | 1:6   | 25           |
| <sup>a</sup> P14         | s-PEG-PLGA          | PEG-PLGA:PLGA(1:2) | 2.5                                            | -                                 | -        | BRP-201 + NLO | 1:6   | 25           |
| <b>Larger particles</b>  |                     |                    |                                                |                                   |          |               |       |              |
| <sup>a</sup> P15         | l-HNP-COOH          | PLGA               | 25                                             | DSPE-PEG-COOH                     | Lecithin | BRP-201 + NLO | 1:7.5 | 25           |
| <sup>a</sup> P16         | l-HNP-RGD           | PLGA               | 25                                             | DSPE-PEG-RGD                      | Lecithin | BRP-201 + NLO | 1:7.5 | 25           |
| <sup>a</sup> P17         | l-HNP-COOH/RGD(1:1) | PLGA               | 25                                             | DSPE-PEG-COOH: DSPE-PEG-RGD (1:1) | Lecithin | BRP-201 + NLO | 1:7.5 | 25           |
| <sup>a</sup> P18         | HNP-COOH/RGD(2:1)   | PLGA               | 25                                             | DSPE-PEG-COOH: DSPE-PEG-RGD (2:1) | Lecithin | BRP-201 + NLO | 1:7.5 | 25           |
| <sup>a</sup> P19         | l-PEG-PLGA          | PEG-PLGA:PLGA(1:2) | 25                                             | -                                 | -        | BRP-201 + NLO | 1:7.5 | 25           |

Solvent-to-water ratio (S/W). The polymer was dissolved in CH<sub>3</sub>CN, the drug and dye were dissolved in DMSO, the lipids were dissolved in a 4 wt% ethanol in water solution. The lipid to polymer ratio (L/P ratio) was always 15 wt% referred to the polymer mass. The initial amount of dye NLO was 0.1 wt% and the initial amount of the drug BRP-201 was 3 wt%. <sup>a</sup>Formulation performed with n = 3.

#### 4.2.2 Particle characteristics

**Table S7:** DLS and ELS data, stability over time in water, yield and LC values from all HNPs loaded with BRP-201 and NLO.

| P#                       | Sample              | d <sub>H</sub> [nm] (PDI) after purification | ζ in water [mV] | ζ in NaCl [mV] | d <sub>H</sub> [nm] (PDI) after 2 weeks | d <sub>H</sub> [nm] (PDI) after 4 weeks | Yield [%] | LC <sub>NLO</sub> [%] | LC <sub>BRP-201</sub> [%] | d <sub>H</sub> [nm] (PDI) after filtration | LC <sub>NLO</sub> after filtration [%] | LC <sub>BRP-201</sub> after filtration [%] |
|--------------------------|---------------------|----------------------------------------------|-----------------|----------------|-----------------------------------------|-----------------------------------------|-----------|-----------------------|---------------------------|--------------------------------------------|----------------------------------------|--------------------------------------------|
| <b>Smaller particles</b> |                     |                                              |                 |                |                                         |                                         |           |                       |                           |                                            |                                        |                                            |
| <sup>a</sup> P10         | S-HNP-COOH          | 137 (0.23)                                   | -24             | -0.3           | 118 (0.19)                              | 115 (0.20)                              | 60        | 0.06                  | 1.33                      | 111 (0.05)                                 | 0.03                                   | 0.40                                       |
| <sup>a</sup> P11         | S-HNP-RGD           | 153 (0.32)                                   | -40             | -11            | 171 (0.29)                              | 157 (0.27)                              | 52        | 0.07                  | 1.24                      | 141 (0.08)                                 | 0.06                                   | 0.40                                       |
| <sup>a</sup> P12         | S-HNP-COOH/RGD(1:1) | 143 (0.27)                                   | -36             | -8             | 152 (0.27)                              | 150 (0.23)                              | 62        | 0.06                  | 1.00                      | 138 (0.06)                                 | 0.05                                   | 0.38                                       |
| <sup>a</sup> P13         | S-HNP-COOH/RGD(2:1) | 139 (0.24)                                   | -41             | -6             | 150 (0.23)                              | 144 (0.20)                              | 52        | 0.07                  | 1.07                      | 138 (0.08)                                 | 0.05                                   | 0.47                                       |
| <sup>a</sup> P14         | S-PEG-PLGA          | 142 (0.25)                                   | -35             | -5             | 151 (0.26)                              | 148 (0.23)                              | 53        | 0.07                  | 1.15                      | 138 (0.11)                                 | 0.05                                   | 0.43                                       |
| <b>Larger particles</b>  |                     |                                              |                 |                |                                         |                                         |           |                       |                           |                                            |                                        |                                            |
| <sup>a</sup> P15         | I-HNP-COOH          | 174 (0.21)                                   | -24             | -1             | 178 (0.14)                              | 176 (0.13)                              | 51        | 0.11                  | 2.89                      | 173 (0.08)                                 | 0.08                                   | 0.99                                       |
| <sup>a</sup> P16         | I-HNP-RGD           | 249 (0.29)                                   | -41             | -8             | 249 (0.17)                              | 247 (0.17)                              | 46        | 0.08                  | 1.37                      | 221 (0.07)                                 | 0.08                                   | 0.49                                       |
| <sup>a</sup> P17         | I-HNP-COOH/RGD(1:1) | 234 (0.25)                                   | -34             | -7             | 240 (0.18)                              | 238 (0.16)                              | 53        | 0.08                  | 1.38                      | 222 (0.09)                                 | 0.09                                   | 0.62                                       |
| <sup>a</sup> P18         | I-HNP-COOH/RGD(2:1) | 256 (0.28)                                   | -35             | -6             | 256 (0.21)                              | 250 (0.18)                              | 51        | 0.08                  | 1.70                      | 222 (0.05)                                 | 0.08                                   | 0.70                                       |
| <sup>a</sup> P19         | I-PEG-PLGA          | 252 (0.27)                                   | -35             | -4             | 249 (0.17)                              | 247 (0.19)                              | 56        | 0.07                  | 1.38                      | 222 (0.10)                                 | 0.08                                   | 0.94                                       |

Hydrodynamic diameter (d<sub>H</sub>), polydispersity index (PDI), zeta potential (ζ), loading capacity (LC). <sup>a</sup>Formulation performed with n = 3.

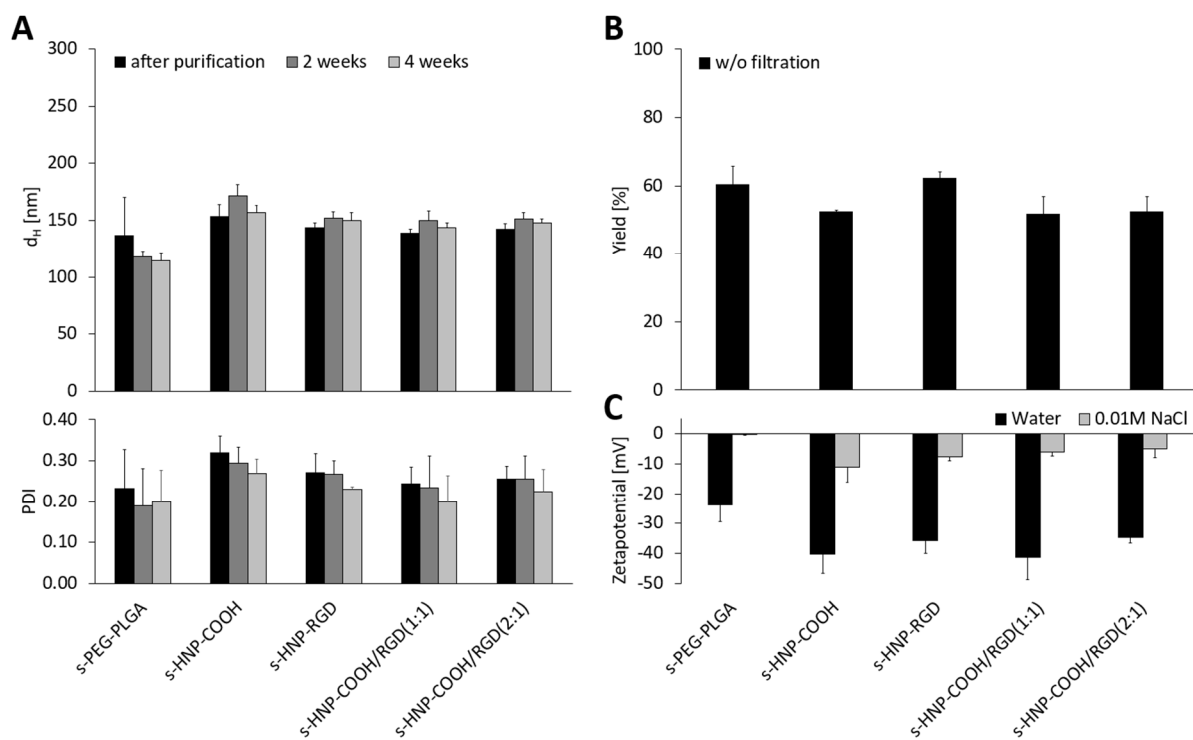

**Figure S14:** (A) Stability of the s-HNPs and s-PEG-PLGA in water over four weeks, (B) yield after purification and (C) zeta potential in water and 0.01 M sodium chloride (NaCl) solution.

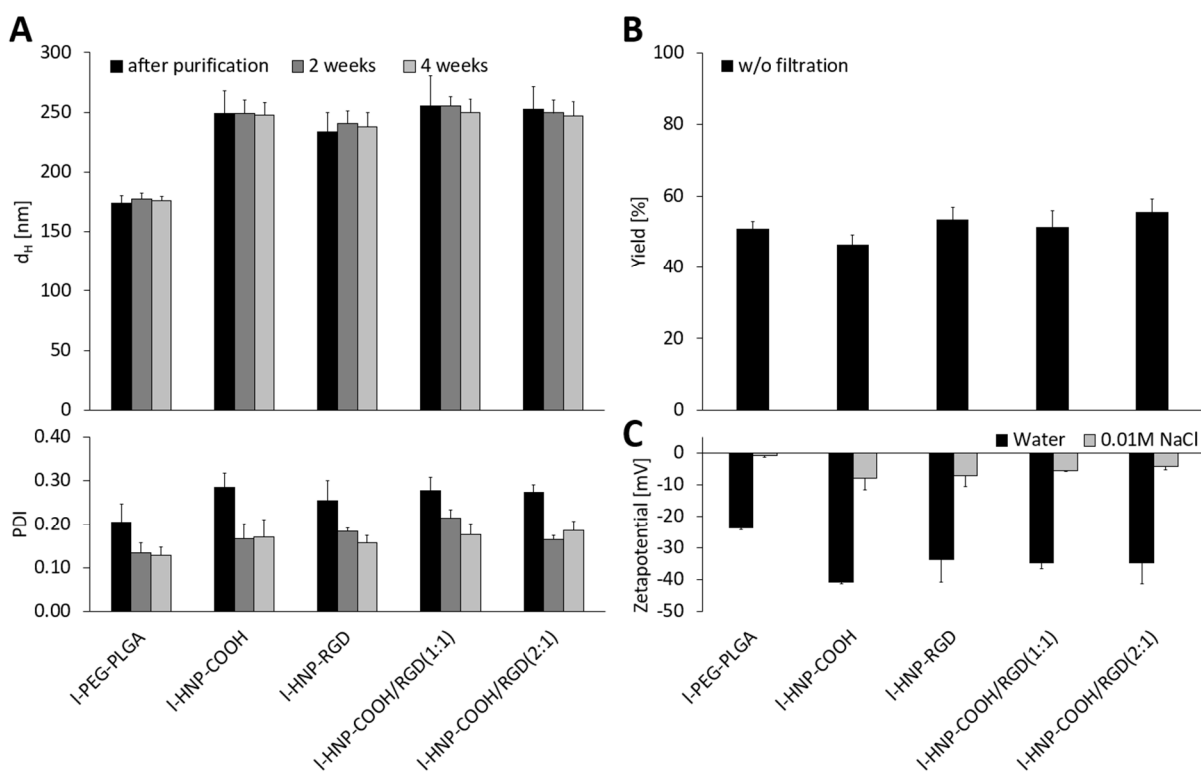

**Figure S15:** (A) Stability of l-HNPs and l-PEG-PLGA in water over four weeks, (B) yield after purification and (C) zeta potential in water and 0.01 M sodium chloride (NaCl) solution.

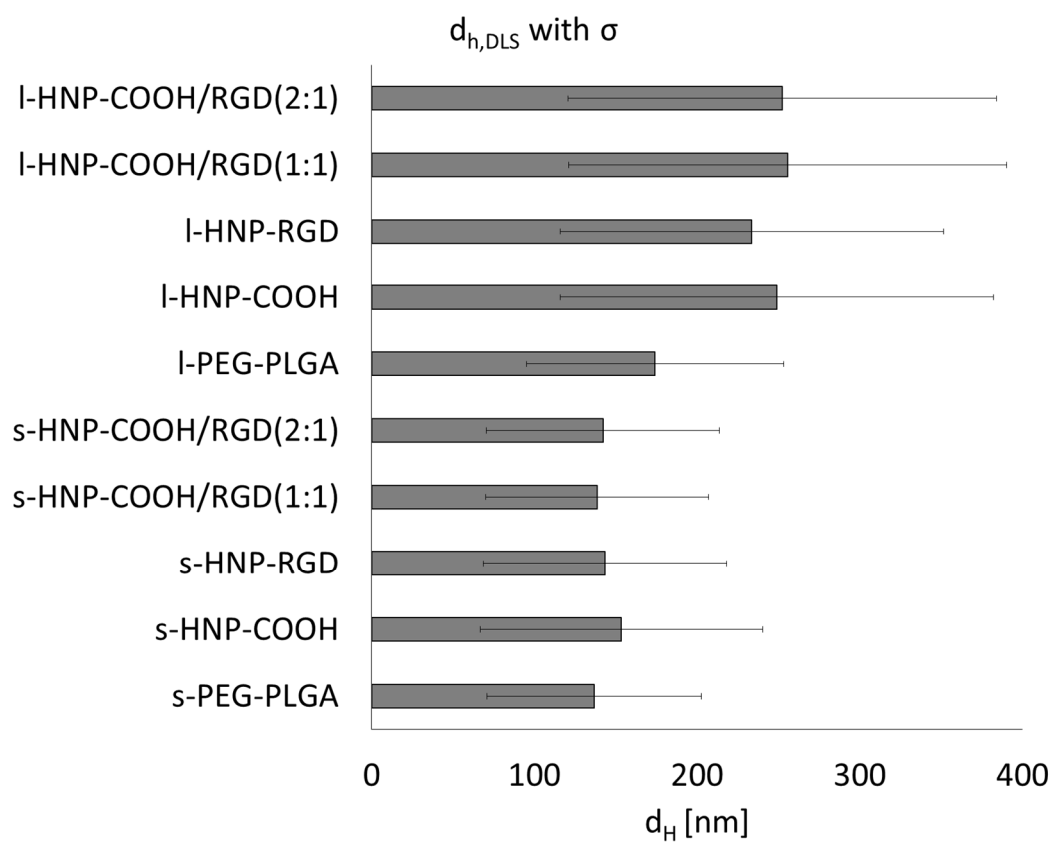

**Figure S16:** Exact size distribution of s- and I-HNPs, as well as s- and I-PEG-PLGA with the standard deviation. Calculated using  $\sigma = \sqrt{PDI} \cdot d_{h,DLS}$ .<sup>[2]</sup>

### 4.2.3 Particle size distribution analysis from SEM images

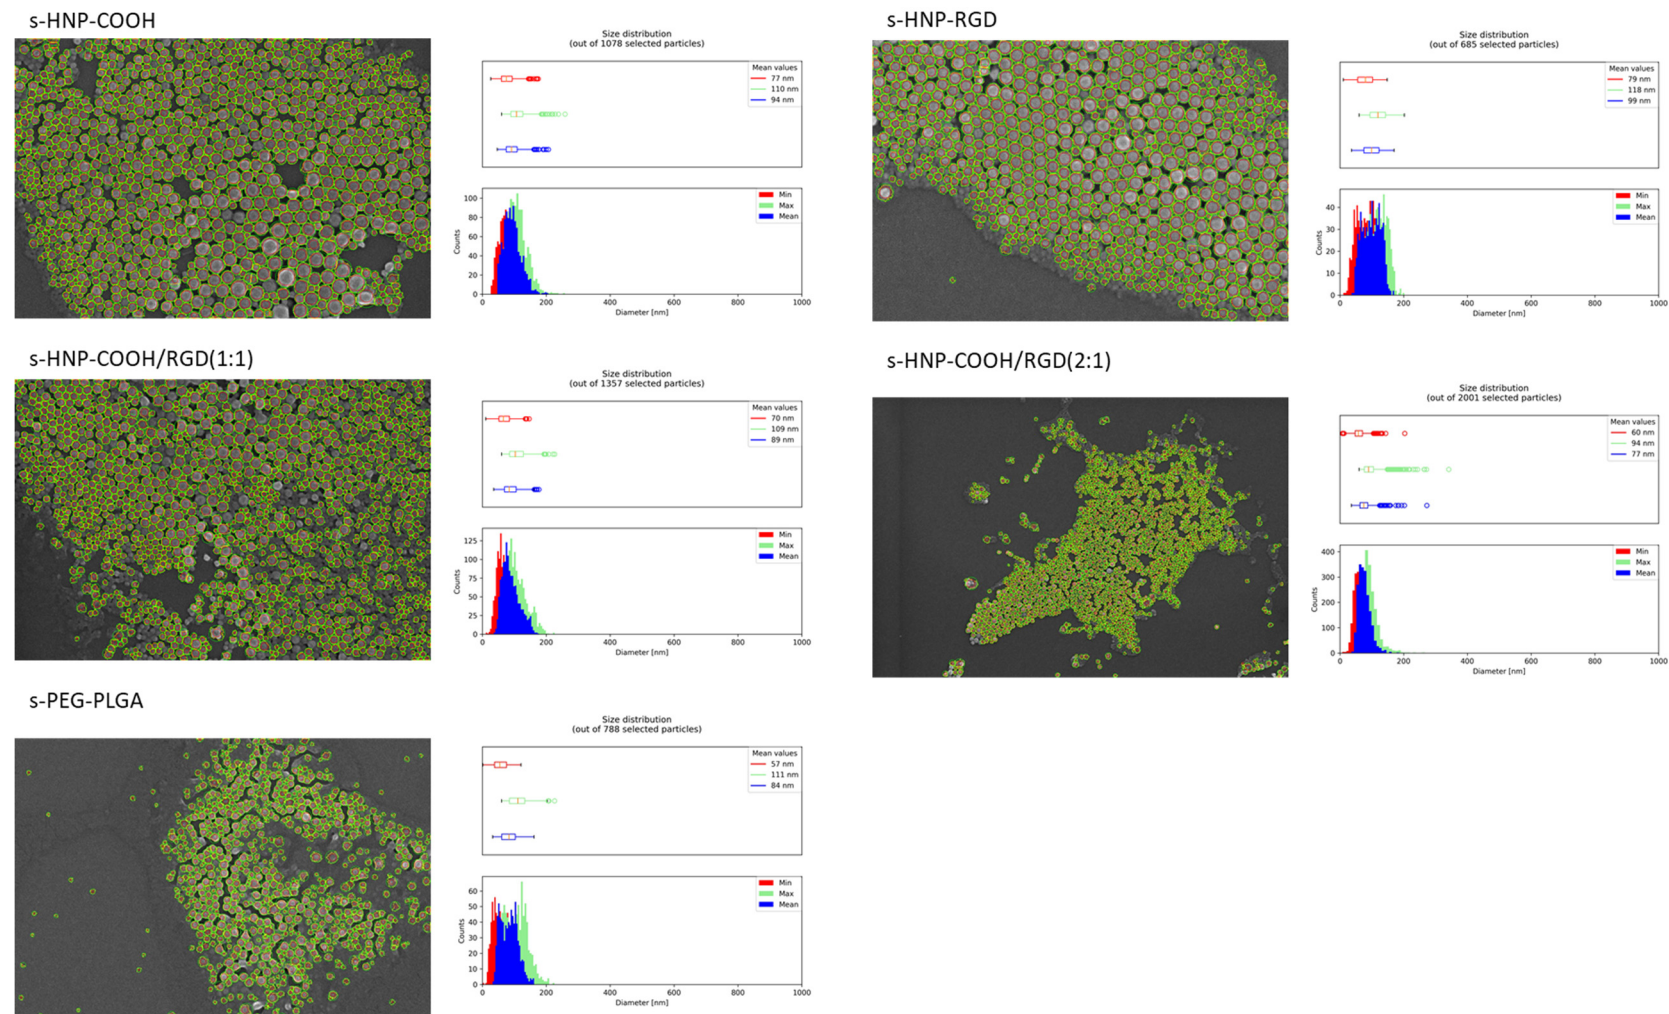

**Figure S17:** SEM size evaluation of s-HNPs after purification by image processing.



I-HNP-COOH

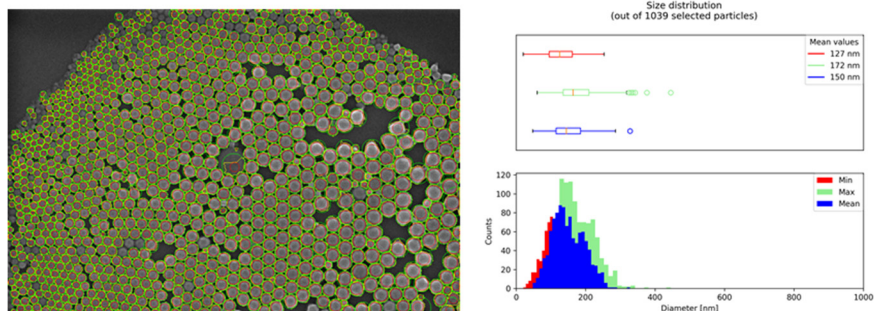

I-HNP-RGD

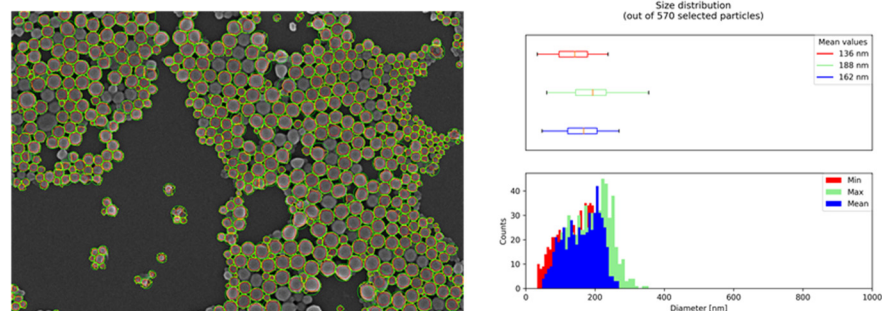

I-HNP-COOH/RGD(1:1)

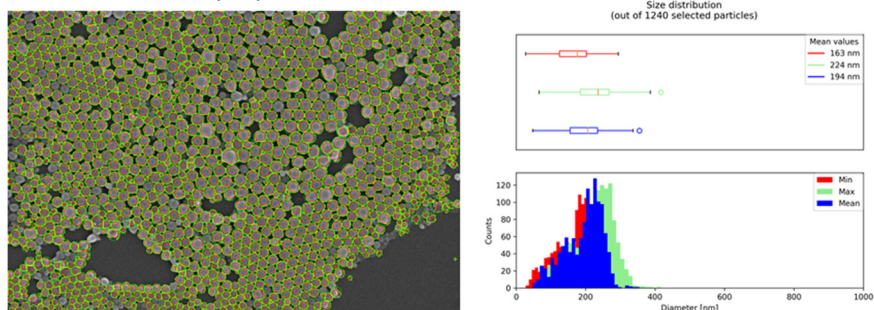

I-HNP-COOH/RGD(2:1)

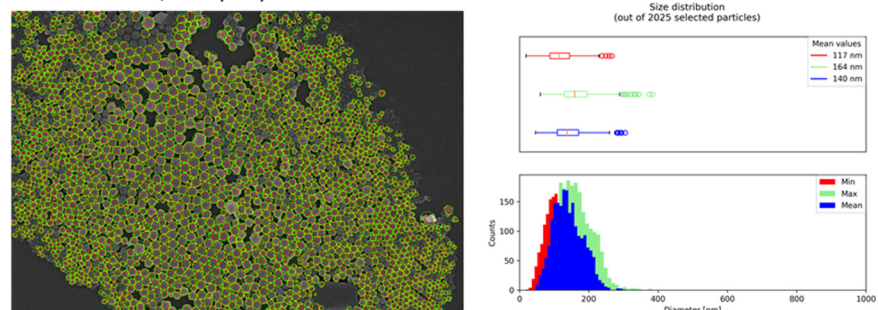

I-PEG-PLGA

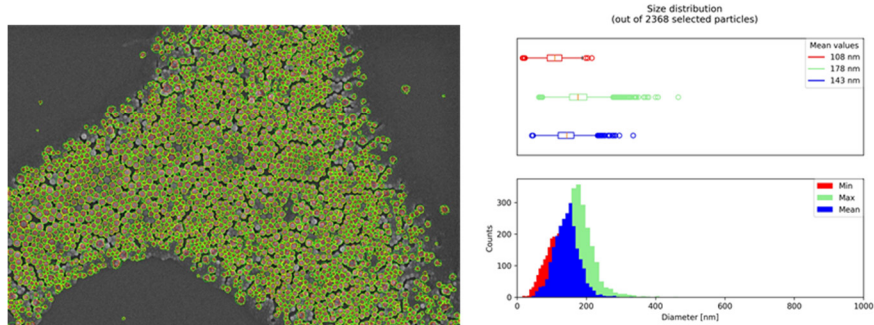

**Figure S18:** SEM size evaluation of I-HNPs by image processing.

#### 4.2.4 Free drug analysis *via* SEM measurements

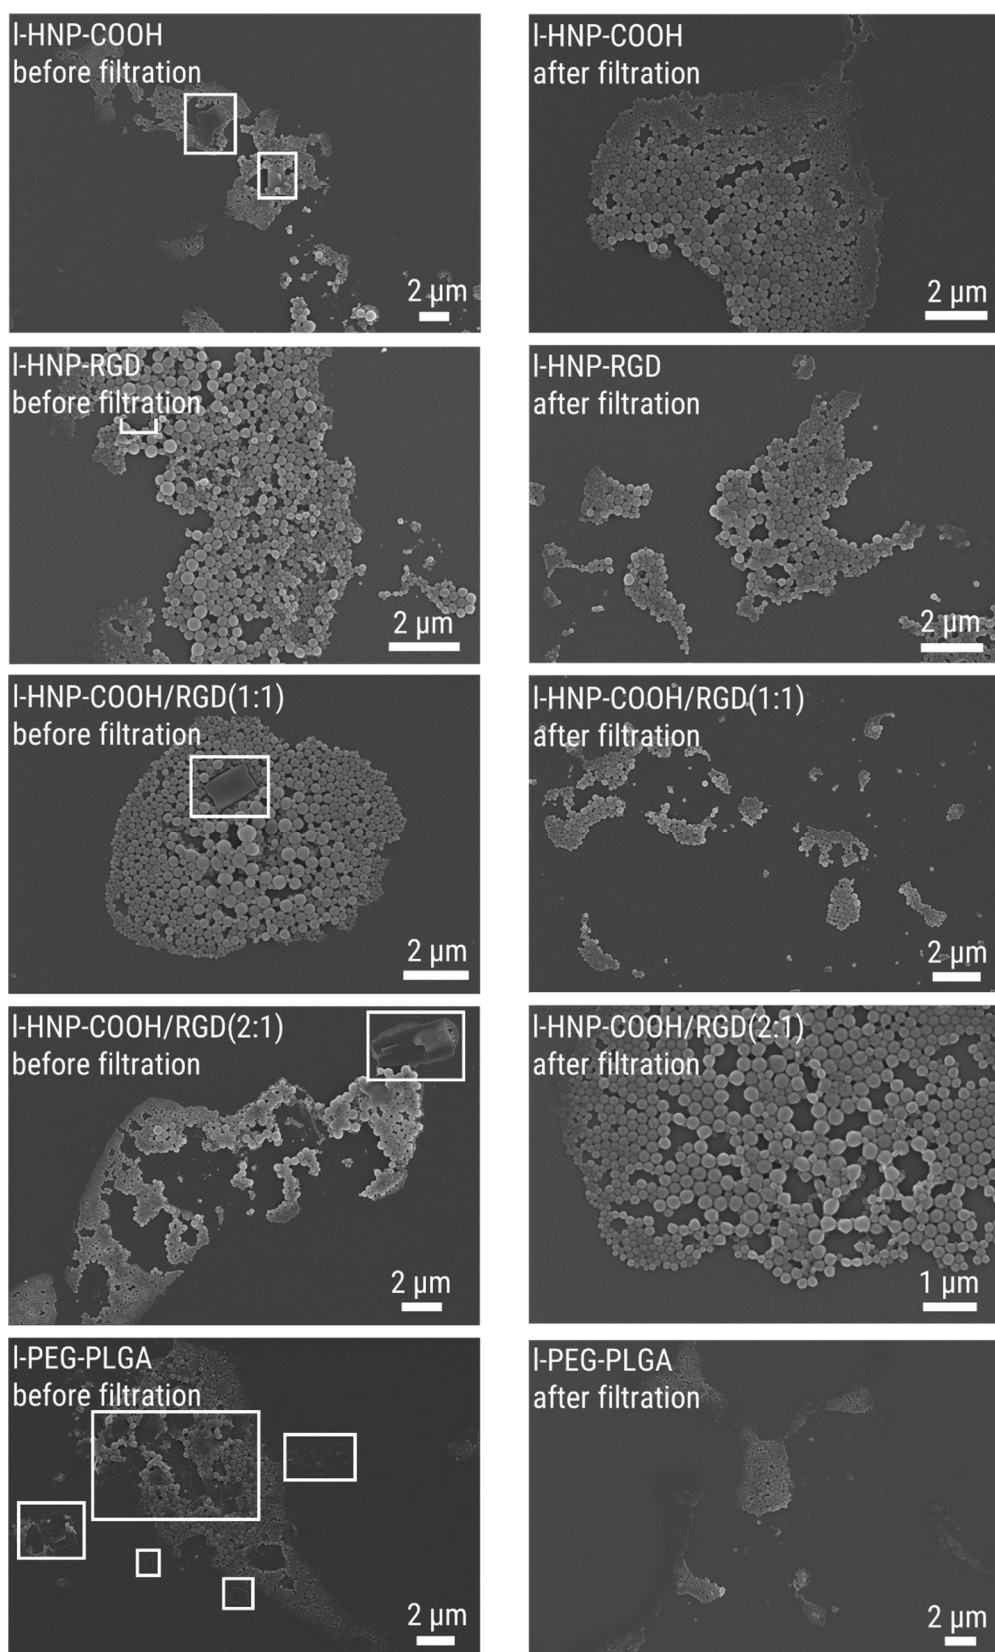

**Figure S19:** SEM images of I-HNPs and I-PEG-PLGA NPs before and after filtration through 0.8 μm cellulose acetate filter. White rectangular box indicates the presence of BRP-201 precipitates in the formulations before the filtration procedure.



#### 4.2.5 Loading capacities of dual loaded HNPs

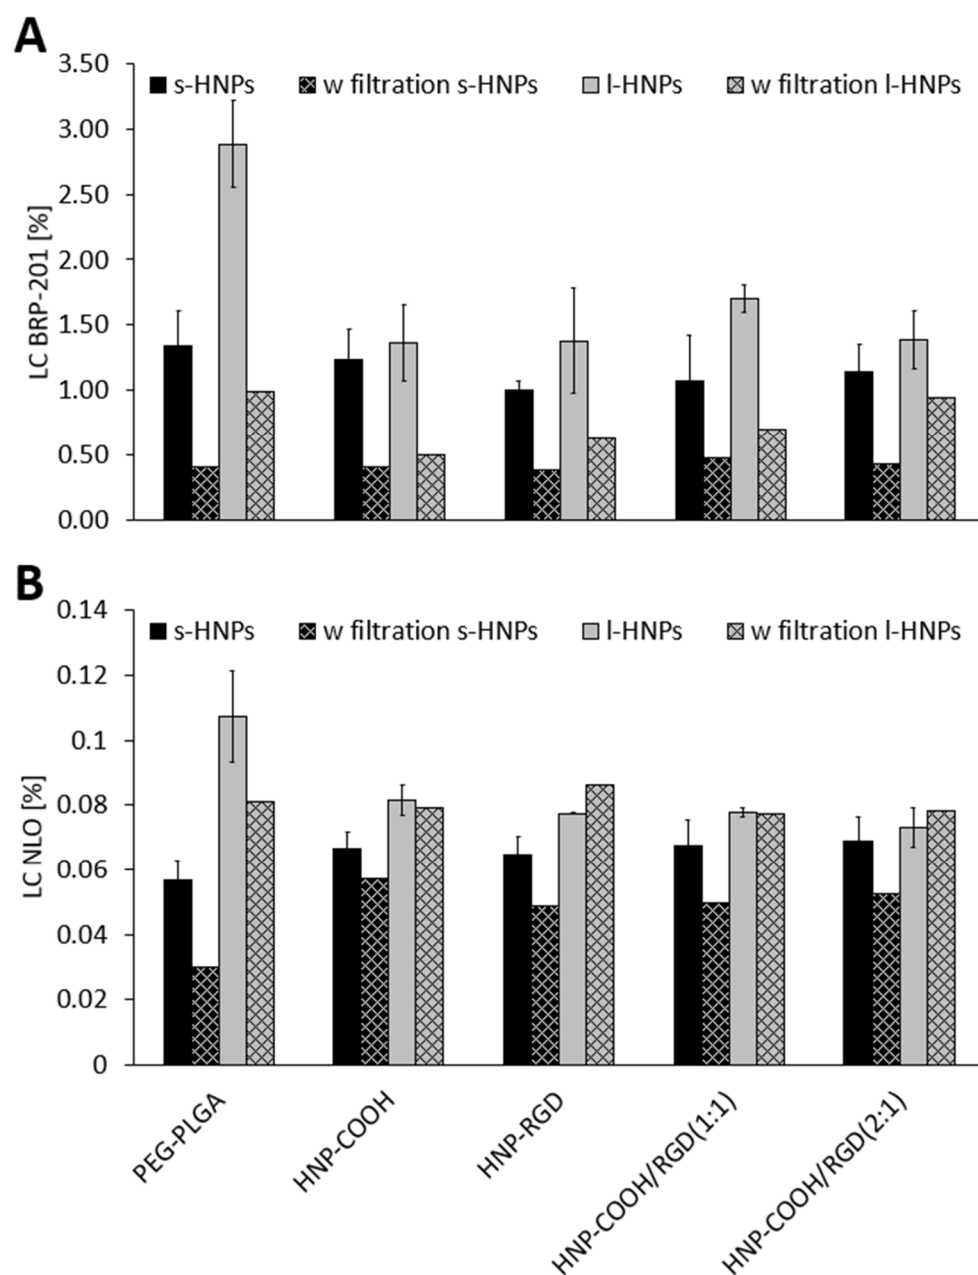

**Figure S20:** (A) BRP-201 and (B) NLO loading capacity (LC) of s- and l-HNPs, as well as s- and l-PEG-PLGA NPs.

#### 4.2.6 Stability in PBS and in acetate buffer

**Table S8:** DLS data of HNP formulations measured in PBS and in acetate buffer (Ac. buffer).

| P#                       | Sample              | d <sub>H</sub> [nm] (PDI)<br>PBS<br>48 h | d <sub>H</sub> [nm] (PDI)<br>PBS<br>1 weeks | d <sub>H</sub> [nm] (PDI)<br>PBS<br>3 weeks | d <sub>H</sub> [nm] (PDI)<br>Ac.buffer<br>48 h | d <sub>H</sub> [nm] (PDI)<br>Ac.buffer<br>1 weeks | d <sub>H</sub> [nm] (PDI)<br>Ac.buffer<br>3 weeks |
|--------------------------|---------------------|------------------------------------------|---------------------------------------------|---------------------------------------------|------------------------------------------------|---------------------------------------------------|---------------------------------------------------|
| <b>Smaller particles</b> |                     |                                          |                                             |                                             |                                                |                                                   |                                                   |
| <sup>a</sup> P10         | s-HNP-COOH          | 121 (0.19)                               | 115 (0.14)                                  | 116 (0.13)                                  | 121 (0.16)                                     | 120 (0.15)                                        | 117 (0.12)                                        |
| <sup>a</sup> P11         | s-HNP-RGD           | 157 (0.27)                               | 158 (0.26)                                  | 155 (0.26)                                  | 158 (0.27)                                     | 156 (0.26)                                        | 155 (0.27)                                        |
| <sup>a</sup> P12         | s-HNP-COOH/RGD(1:1) | 143 (0.24)                               | 143 (0.19)                                  | 146 (0.20)                                  | 148 (0.23)                                     | 146 (0.19)                                        | 146 (0.21)                                        |
| <sup>a</sup> P13         | s-HNP-COOH/RGD(2:1) | 144 (0.22)                               | 142 (0.20)                                  | 143 (0.19)                                  | 145 (0.21)                                     | 143 (0.18)                                        | 151 (0.20)                                        |
| <sup>a</sup> P14         | s-PEG-PLGA          | 144 (0.23)                               | 143 (0.21)                                  | 145 (0.22)                                  | 145 (0.24)                                     | 145 (0.22)                                        | 147 (0.20)                                        |
| <b>Larger particles</b>  |                     |                                          |                                             |                                             |                                                |                                                   |                                                   |
| <sup>a</sup> P15         | I-HNP-COOH          | 172 (0.11)                               | 166 (0.10)                                  | 172 (0.10)                                  | 171 (0.12)                                     | 169 (0.10)                                        | 169 (0.13)                                        |
| <sup>a</sup> P16         | I-HNP-RGD           | 227 (0.18)                               | 225 (0.14)                                  | 240 (0.13)                                  | 235 (0.16)                                     | 234 (0.15)                                        | 238 (0.15)                                        |
| <sup>a</sup> P17         | I-HNP-COOH/RGD(1:1) | 227 (0.16)                               | 225 (0.13)                                  | 231 (0.13)                                  | 232 (0.14)                                     | 232 (0.14)                                        | 234 (0.16)                                        |
| <sup>a</sup> P18         | I-HNP-COOH/RGD(2:1) | 239 (0.15)                               | 239 (0.18)                                  | 248 (0.16)                                  | 246 (0.17)                                     | 249 (0.18)                                        | 251 (0.16)                                        |
| <sup>a</sup> P19         | I-PEG-PLGA          | 232 (0.20)                               | 234 (0.15)                                  | 235 (0.15)                                  | 239 (0.17)                                     | 239 (0.16)                                        | 241 (0.16)                                        |

Hydrodynamic diameter (d<sub>H</sub>), polydispersity index (PDI), phosphate-buffered saline (PBS), acetate buffer (Ac.buffer). <sup>a</sup>Formulation performed with n = 3.

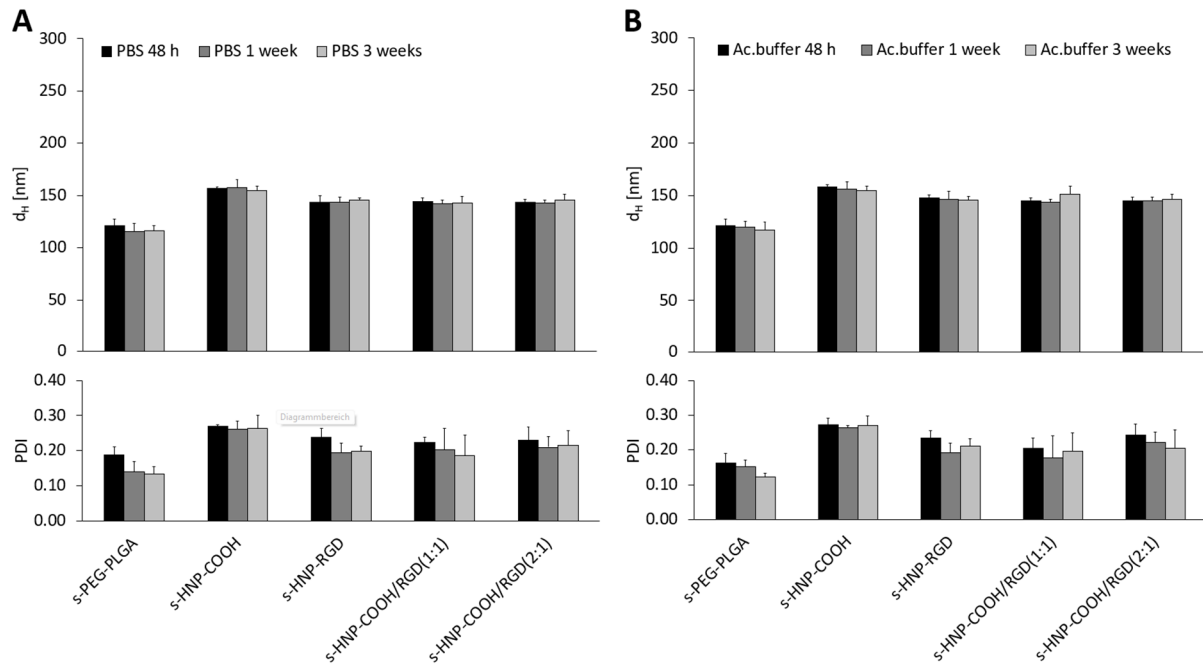

**Figure S21:** Buffer stability of smaller particles: s-HNPs and s-PEG-PLGA in (A) PBS and (B) acetate buffer (Ac. buffer).

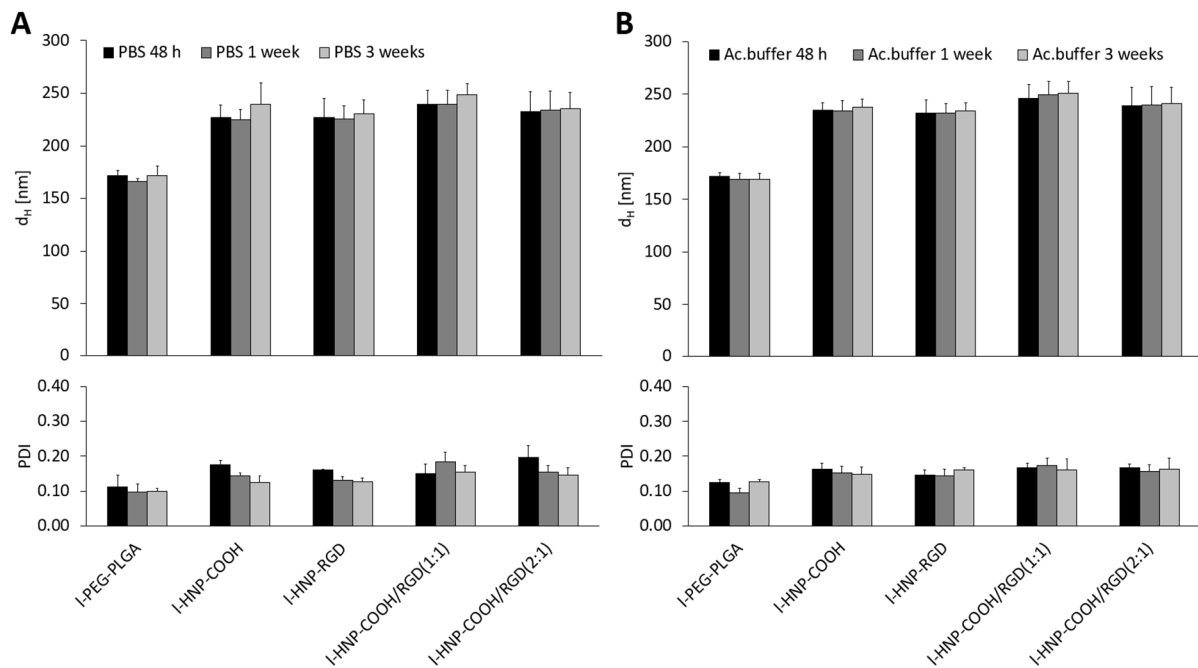

**Figure S22:** Buffer stability of l-HNPs and l-PEG-PLGA in (A) PBS and (B) acetate buffer (Ac. buffer).

#### 4.2.7 HPLC analysis of dual loaded HNPS and NPs

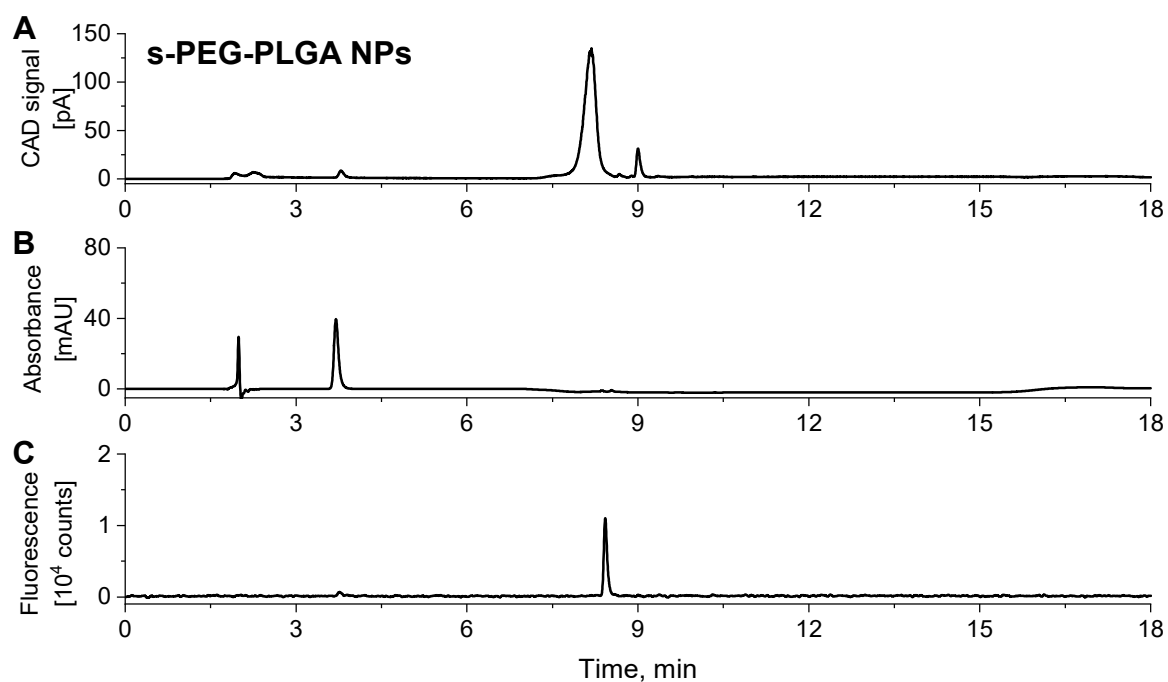

**Figure S23:** (A) Elugram of dual loaded (with the drug BRP-201 and the dye NLO) s-PEG-PLGA NPs recorded by CAD. (B) Elugram of s-PEG-PLGA NPs recorded by DAD at 312 nm. The peak at 3.7 min refers to BRP-201. (C) Elugram of s-PEG-PLGA NPs recorded by FLD ( $\lambda_{\text{ex}} = 555 \text{ nm}$ ,  $\lambda_{\text{em}} = 592 \text{ nm}$ ). The peak at 8.4 min refers to NLO. Measurement conditions: Flow rate  $0.75 \text{ mL min}^{-1}$ ,  $\text{CH}_3\text{CN}/\text{water}$  with 10 mM ammonium acetate (pH 5.5)/ $\text{CH}_3\text{OH}$  with 10 mM ammonium acetate, gradient conditions can be found in **Figure S2**.

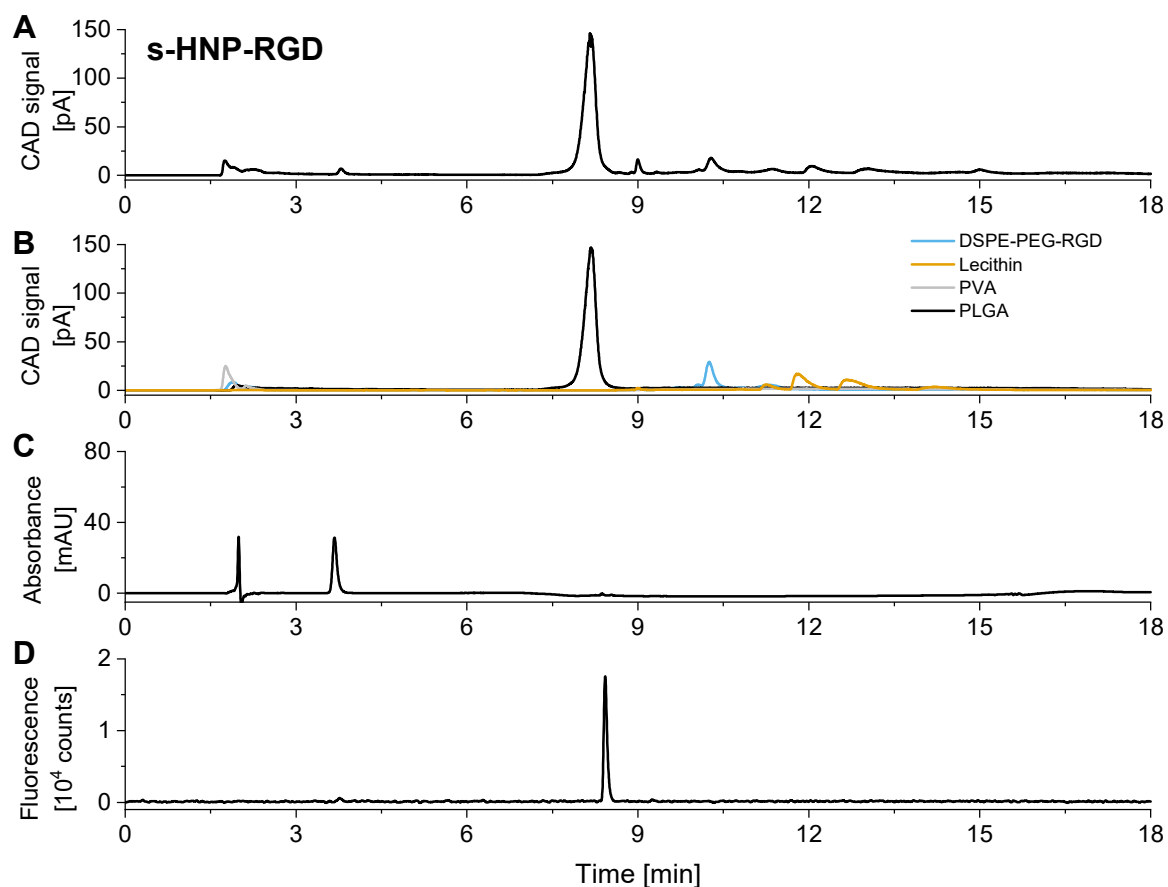

**Figure S24:** (A) Elugram of dual loaded (with the drug BRP-201 and the dye NLO) s-HNP-RGD recorded by CAD. (B) Elugrams of PLGA, DSPE-PEG-RGD, lecithin, and PVA standards. For simplicity of interpretation, the signal intensities of DSPE-PEG-RGD, lecithin, and PVA are multiplied with a factor of 0.25. (C) Elugram of s-HNP-RGD recorded by DAD at 312 nm. Peak at 3.7 min refers to BRP-201. (D) Elugram of s-HNP-RGD recorded by FLD ( $\lambda_{\text{ex}} = 555 \text{ nm}$ ,  $\lambda_{\text{em}} = 592 \text{ nm}$ ). The peak at 8.4 min refers to NLO. Measurement conditions: Flow rate  $0.75 \text{ mL min}^{-1}$ ,  $\text{CH}_3\text{CN}/\text{water}$  with 10 mM ammonium acetate (pH 5.5)/ $\text{CH}_3\text{OH}$  with 10 mM ammonium acetate. The gradient conditions can be found in **Figure S2**.

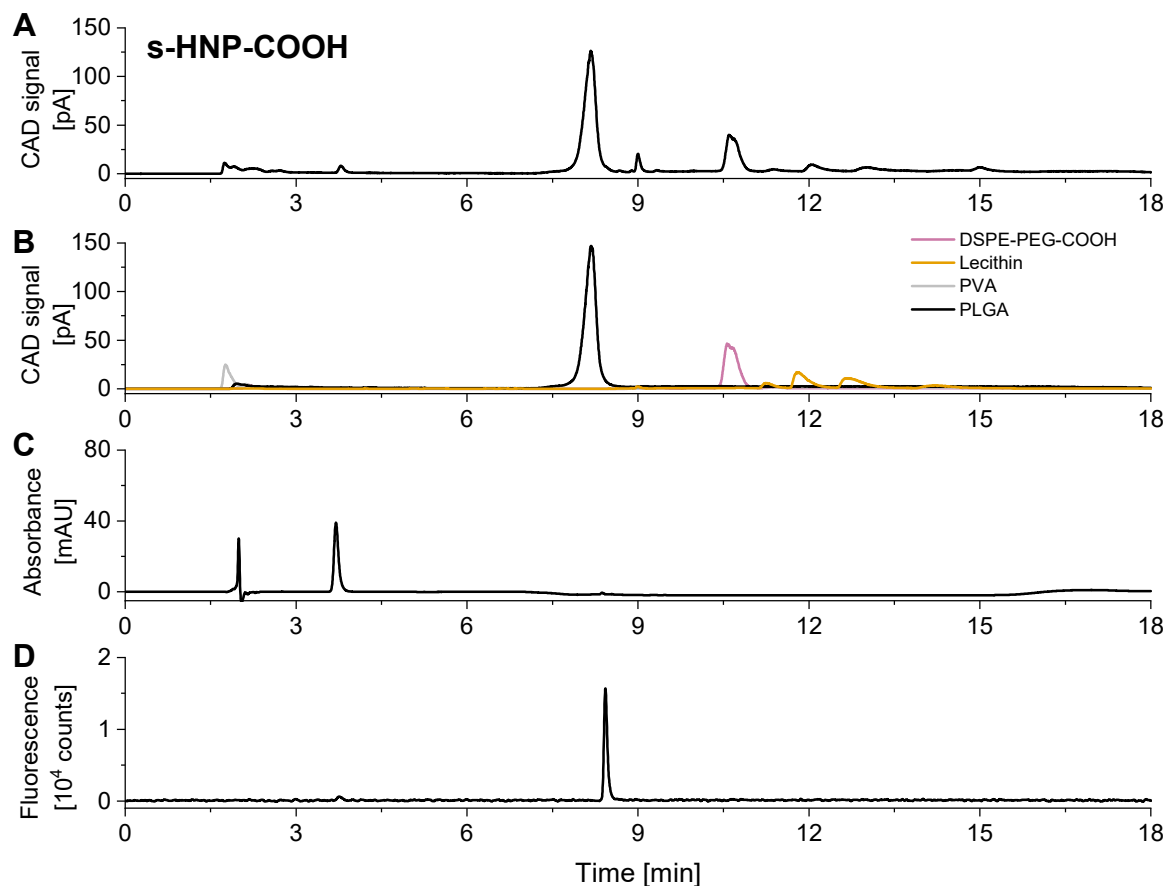

**Figure S25:** (A) Elugram of dual loaded (with the drug BRP-201 and the dye NLO) s-HNP-COOH recorded by CAD. (B) Elugrams of PLGA, DSPE-PEG-COOH, lecithin, and PVA standards. For simplicity of interpretation, the signal intensities of DSPE-PEG-COOH, lecithin, and PVA are multiplied with a factor of 0.25. (C) Elugram of s-HNP-COOH recorded by DAD at 312 nm. Peak at 3.7 min refers to BRP-201. (D) Elugram of s-HNP-COOH recorded by FLD ( $\lambda_{\text{ex}} = 555 \text{ nm}$ ,  $\lambda_{\text{em}} = 592 \text{ nm}$ ). The peak at 8.4 min refers to NLO. Measurement conditions: Flow rate  $0.75 \text{ mL min}^{-1}$ ,  $\text{CH}_3\text{CN/water}$  with 10 mM ammonium acetate (pH 5.5)/  $-\text{CH}_3\text{OH}$  with 10 mM ammonium acetate. The gradient conditions can be found in Figure S2.

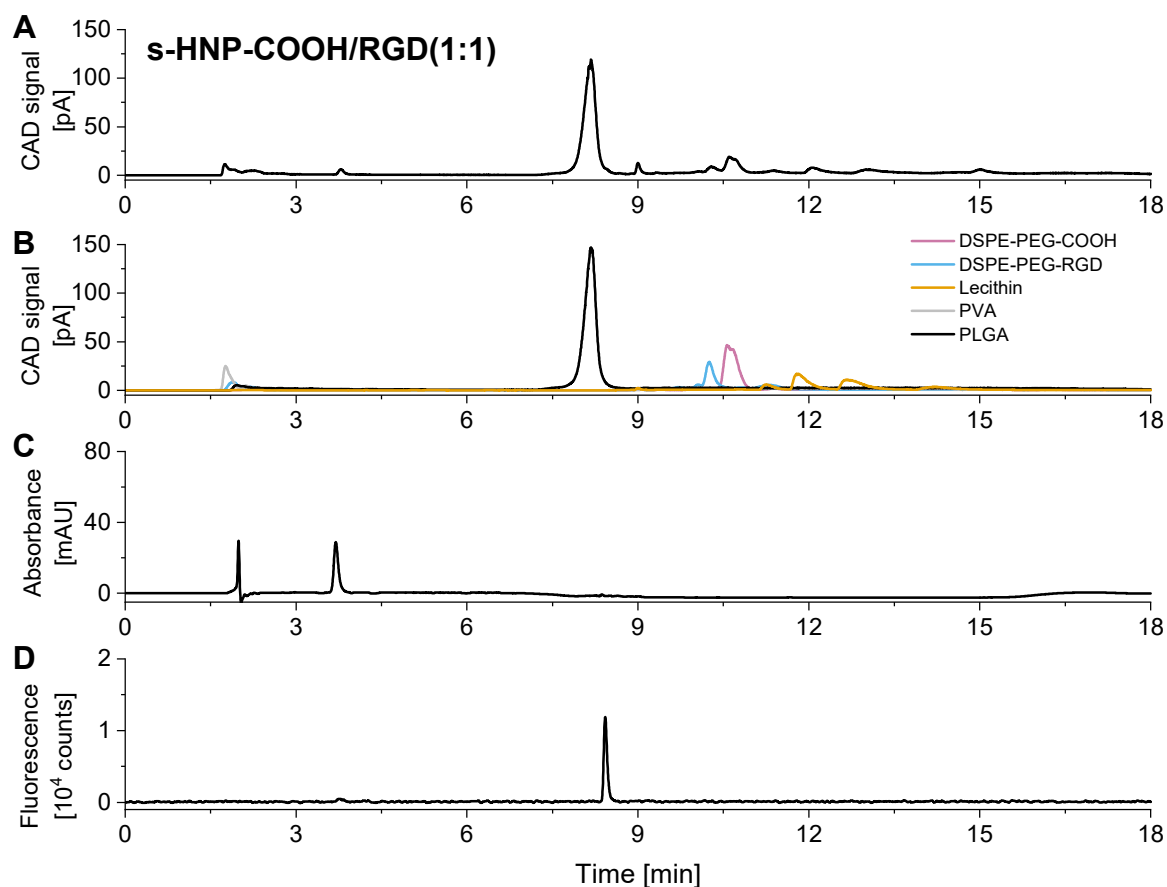

**Figure S26:** (A) Elugram of dual loaded (with the drug BRP-201 and the dye NLO) s-HNP-COOH/RGD(1:1) recorded by CAD. (B) Elugrams of PLGA, DSPE-PEG-COOH, DSPE-PEG-RGD, lecithin, and PVA standards. For simplicity of interpretation, the signal intensities of DSPE-PEG-COOH, DSPE-PEG-RGD, lecithin, and PVA are multiplied with a factor of 0.25. (C) Elugram of s-HNP-COOH/RGD(1:1) recorded by DAD at 312 nm. Peak at 3.7 min refers to BRP-201. (D) Elugram of s-HNP-COOH/RGD(1:1) recorded by FLD ( $\lambda_{\text{ex}} = 555 \text{ nm}$ ,  $\lambda_{\text{em}} = 592 \text{ nm}$ ). The peak at 8.4 min refers to NLO. Measurement conditions: Flow rate  $0.75 \text{ mL min}^{-1}$ ,  $\text{CH}_3\text{CN}/\text{water}$  with 10 mM ammonium acetate (pH 5.5)/  $-\text{CH}_3\text{OH}$  with 10 mM ammonium acetate. The gradient conditions can be found in **Figure S2**.

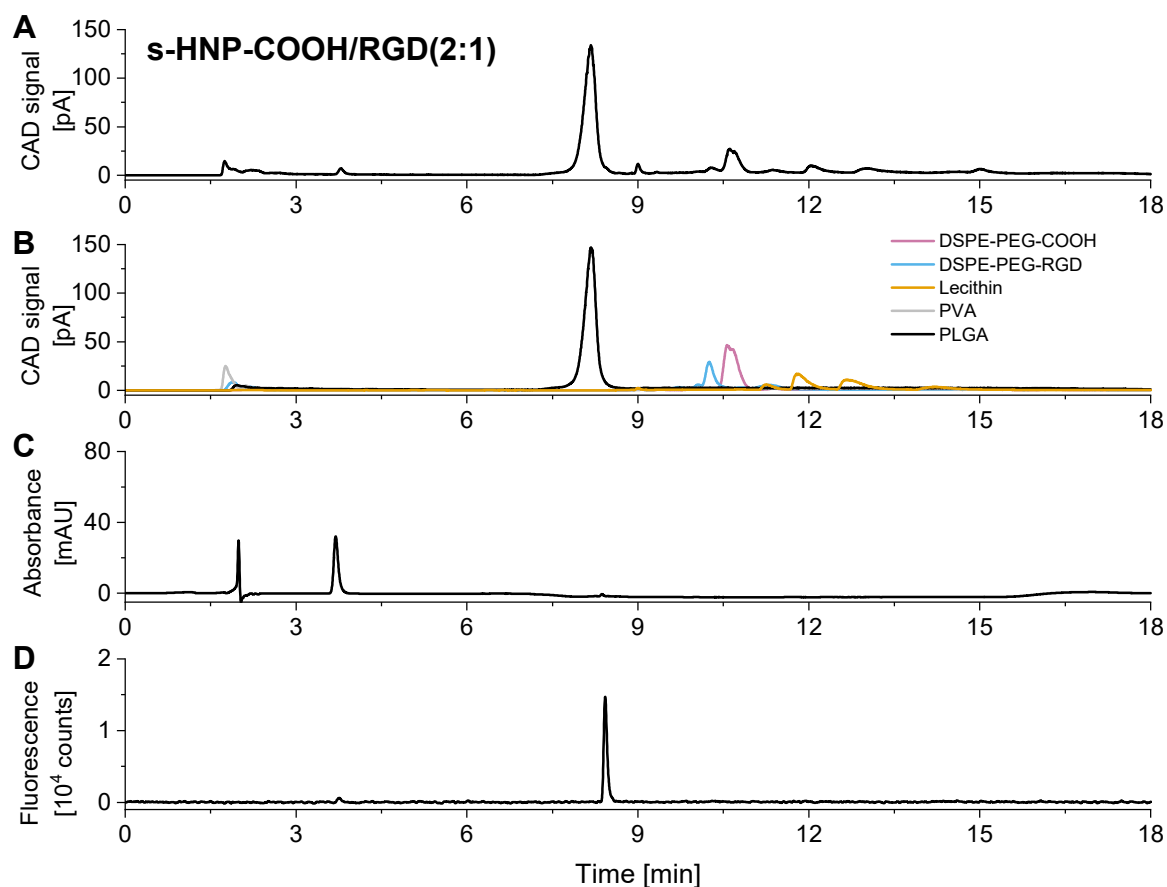

**Figure S27:** (A) Elugram of dual loaded (with the drug BRP-201 and the dye NLO) s-HNP-COOH/RGD(2:1) recorded by CAD. (B) Elugrams of PLGA, DSPE-PEG-COOH, DSPE-PEG-RGD, lecithin, and PVA standards. For simplicity of interpretation, the signal intensities of DSPE-PEG-COOH, DSPE-PEG-RGD, lecithin, and PVA are multiplied with a factor of 0.25. (C) Elugram of s-HNP-COOH/RGD(2:1) recorded by DAD at 312 nm. Peak at 3.7 min refers to BRP-201. (D) Elugram of s-HNP-COOH/RGD(2:1) recorded by FLD ( $\lambda_{\text{ex}} = 555 \text{ nm}$ ,  $\lambda_{\text{em}} = 592 \text{ nm}$ ). The peak at 8.4 min refers to NLO. Measurement conditions: Flow rate  $0.75 \text{ mL min}^{-1}$ ,  $\text{CH}_3\text{CN/water}$  with 10 mM ammonium acetate (pH 5.5)/ $\text{CH}_3\text{OH}$  with 10 mM ammonium acetate. The gradient conditions can be found in **Figure S2**.



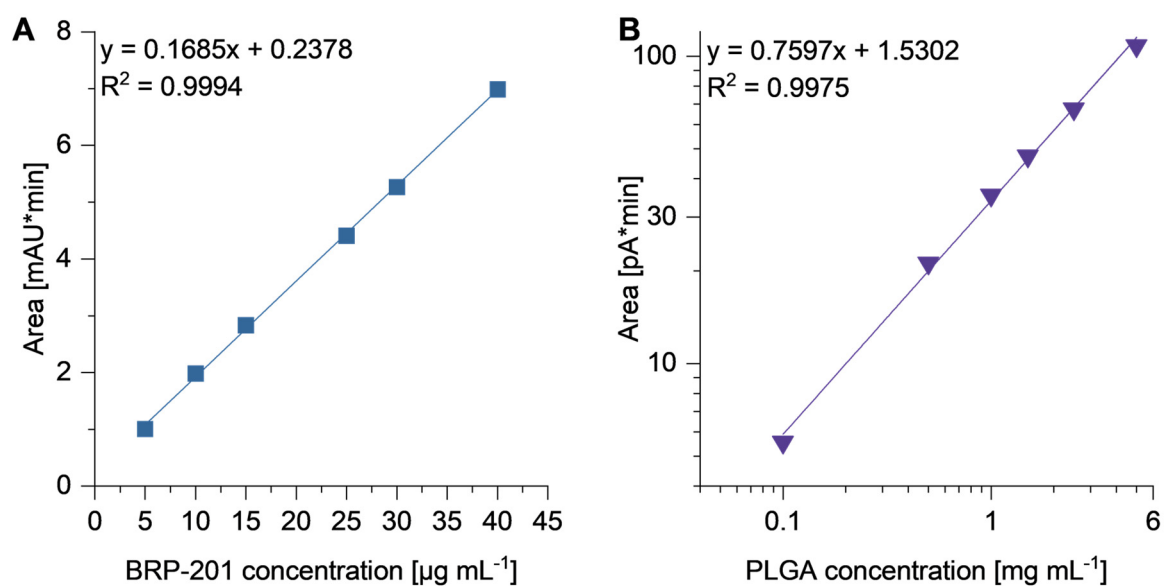

**Figure S28:** (A) Calibration curve for BRP-201 and (B) double-logarithmic calibration curve for PLGA presented by plotting peak areas as a function of analyte concentrations. Data were fitted linearly. Data were collected at the same elution conditions as shown in **Figure S2**.

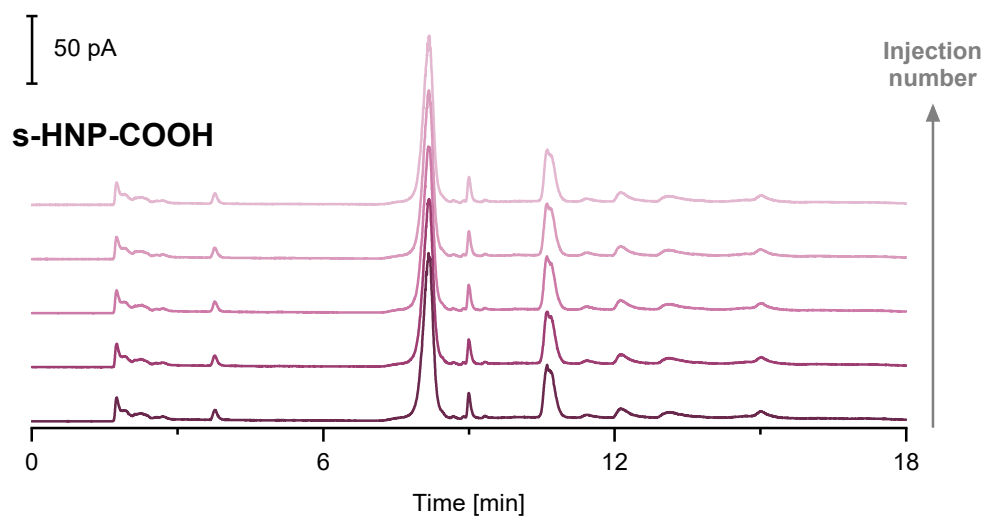

**Figure S29:** Elution repeatability experiment by five successive injections of s-HNP-COOH recorded by CAD. Measurement conditions: Flow rate  $0.75 \text{ mL min}^{-1}$ ,  $\text{CH}_3\text{CN}/\text{water}$  with 10 mM ammonium acetate (pH 5.5)/ $\text{CH}_3\text{OH}$  with 10 mM ammonium acetate. The gradient conditions can be found in **Figure S2**.

**Table S9:** Compositional analysis of an example batch of formulated s-HNPs and s-NPs. The values were calculated using the calibration data (**Figure S28**).

| P#                       | Sample              | m <sub>lyo</sub><br>[mg] | BRP-201<br>[μg mL <sup>-1</sup> ] | PLGA<br>[mg mL <sup>-1</sup> ] | LC <sub>BRP-201</sub> [%]<br>(rel. to m <sub>lyo</sub> ) | LC <sub>BRP-201</sub> [%]<br>(rel. to m <sub>polymer</sub> ) |
|--------------------------|---------------------|--------------------------|-----------------------------------|--------------------------------|----------------------------------------------------------|--------------------------------------------------------------|
| <b>Smaller particles</b> |                     |                          |                                   |                                |                                                          |                                                              |
| P10                      | s-HNP-COOH          | 1.114                    | 21.005                            | 0.923                          | 1.89                                                     | 2.28                                                         |
| P11                      | s-HNP-RGD           | 1.322                    | 16.313                            | 1.143                          | 1.23                                                     | 1.43                                                         |
| P12                      | s-HNP-COOH/RGD(1:1) | 0.949                    | 15.599                            | 0.862                          | 1.64                                                     | 1.81                                                         |
| P13                      | s-HNP-COOH/RGD(2:1) | 1.156                    | 16.985                            | 1.017                          | 1.47                                                     | 1.67                                                         |
| P14                      | s-PEG-PLGA          | 1.003                    | 21.429                            | -                              | 2.14                                                     | -                                                            |

**Table S10:** Repeatability study of the developed method with standard deviation (SD, %) and coefficient of variation (CV, %) for PLGA and DSPE-PEG-COOH retention time and peak area values calculated from five repeated injections of s-HNP-COOH (**Figure S29**).

| s-HNP-COOH   | PLGA                    |                       | DSPE-PEG-COOH           |                       |
|--------------|-------------------------|-----------------------|-------------------------|-----------------------|
|              | Retention time<br>[min] | Peak area<br>[pA*min] | Retention time<br>[min] | Peak area<br>[pA*min] |
| Injection 1  | 8.179                   | 31.754                | 10.612                  | 9.373                 |
| Injection 2  | 8.176                   | 31.839                | 10.611                  | 9.482                 |
| Injection 3  | 8.165                   | 32.042                | 10.606                  | 9.472                 |
| Injection 4  | 8.180                   | 31.857                | 10.611                  | 9.535                 |
| Injection 5  | 8.168                   | 31.869                | 10.607                  | 9.406                 |
| <b>SD, %</b> | 0.60                    | 9.40                  | 0.24                    | 5.74                  |
| <b>CV, %</b> | 0.07                    | 0.29                  | 0.02                    | 0.61                  |

#### 4.2.8 Uptake studies in M1-MDMs

**Table S11:** Measurement data of the uptake studies of s- and l-HNPs as well as s- and l-PEG-PLGA NPs in M<sub>1</sub>-MDMs at 100 µg mL<sup>-1</sup> with n = 2, reported as mean fluorescence intensity (MFI) corrected for the fluorescence of the particle samples.

| P#                       | Sample              | Corrected MFI<br>C <sub>HNP</sub> = 100 µg mL <sup>-1</sup> |
|--------------------------|---------------------|-------------------------------------------------------------|
| <b>Smaller particles</b> |                     |                                                             |
| P10                      | s-HNP-COOH          | 114034                                                      |
| P11                      | s-HNP-RGD           | 265855                                                      |
| P12                      | s-HNP-COOH/RGD(1:1) | 267327                                                      |
| P13                      | s-HNP-COOH/RGD(2:1) | 249812                                                      |
| P14                      | s-PEG-PLGA          | 254911                                                      |
| <b>Larger particles</b>  |                     |                                                             |
| P15                      | l-HNP-COOH          | 178207                                                      |
| P16                      | l-HNP-RGD           | 322568                                                      |
| P17                      | l-HNP-COOH/RGD(1:1) | 320783                                                      |
| P18                      | l-HNP-COOH/RGD(2:1) | 293383                                                      |
| P19                      | l-PEG-PLGA          | 326001                                                      |

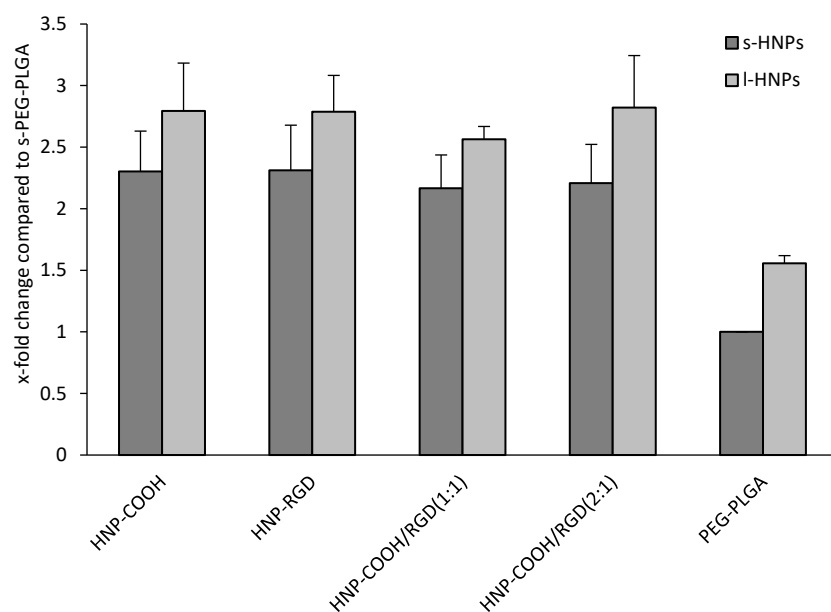

**Figure S30:** Uptake of the s- and l-HNPs as compared to s- and l-PEG-PLGA NPs (P10-P19) in M<sub>1</sub>-MDMs at a concentration of 100 µg mL<sup>-1</sup> (n = 2), reported as X-fold change as compared to the s-PEG-PLGA NPs.

#### 4.2.9 Investigation of the inhibition efficacy (5-LOX product formation assay)

**Table S12:** Measurement data of the 5-LOX product formation inhibition of s- and l- HNPs, as well as s- and l-PEG-PLGA NPs.

| P#                       | Sample              | Inhibition 5-LOX<br>product formation [%]<br>C <sub>BRP-201</sub> = 0.1 µM | Inhibition 5-LOX<br>product formation [%]<br>C <sub>BRP-201</sub> = 0.3 µM |
|--------------------------|---------------------|----------------------------------------------------------------------------|----------------------------------------------------------------------------|
| <b>Smaller particles</b> |                     |                                                                            |                                                                            |
| P10                      | s-HNP-COOH          | 93,54                                                                      | 48,86                                                                      |
| P11                      | s-HNP-RGD           | 84,39                                                                      | 32,40                                                                      |
| P12                      | s-HNP-COOH/RGD(1:1) | 74,23                                                                      | 66,64                                                                      |
| P13                      | s-HNP-COOH/RGD(2:1) | 80,50                                                                      | 44,10                                                                      |
| P14                      | s-PEG-PLGA          | 95,94                                                                      | 80,39                                                                      |
| <b>Larger particles</b>  |                     |                                                                            |                                                                            |
| P15                      | l-HNP-COOH          | /                                                                          | 42,03                                                                      |
| P16                      | l-HNP-RGD           | /                                                                          | 40,81                                                                      |
| P17                      | l-HNP-COOH/RGD(1:1) | /                                                                          | 39,28                                                                      |
| P18                      | l-HNP-COOH/RGD(2:1) | /                                                                          | 35,38                                                                      |
| P19                      | l-PEG-PLGA          | /                                                                          | 47,01                                                                      |

## 5 References

- [1] K. Zhang, P. M. Jordan, S. Pace, R. K. Hofstetter, M. Werner, X. Chen, O. Werz, *J. Inflamm. Res.* **2022**, 3285-3304.
- [2] G. Cinar, J. I. Solomun, P. Mapfumo, A. Traeger, I. Nischang, *Anal. Chim. Acta* **2022**, 1205, 339741.
